# Supplementary material for: Utility of novel viral and immune markers in predicting HBV treatment endpoints: A systematic review of treatment discontinuation studies
Source: PubMed Central journal article supplement — JHEP Rep. 2023 Mar 8;5(6):100720. doi: 10.1016/j.jhepr.2023.100720 (PMC10149368; doi:10.1016/j.jhepr.2023.100720), 2023-03-08
Supplement: mmc1.pdf [file mmc1.pdf]

**Utility of novel viral and immune markers in predicting HBV  
treatment endpoints: A systematic review of treatment  
discontinuation studies**

Georgia Zeng, Apostolos Koffas, Lung-Yi Mak, Upkar S. Gill, Patrick TF Kennedy

Table of contents

|               |   |
|---------------|---|
| Table S1..... | 2 |
| Table S2..... | 3 |
| Table S3..... | 4 |

**Table S1: International Guidelines on HBV Treatment Cessation**

| <b>International Guidelines on HBV Treatment Cessation (<i>In absence of HBsAg loss</i>)</b> |                                                                                                                                    |
|----------------------------------------------------------------------------------------------|------------------------------------------------------------------------------------------------------------------------------------|
| <b>APASL (2015)</b>                                                                          |                                                                                                                                    |
| <b>HBeAg+ populations</b>                                                                    | HBeAg seroconversion & at least 1-3 years of consolidation therapy following virological suppression                               |
| <b>HBeAg- populations</b>                                                                    | At least 2 years of treatment & 1 year of consolidation therapy following virological suppression (tested 3 times, 6 months apart) |
| <b>Follow-up</b>                                                                             | Follow-up monthly for first 3 months, then every 3-6 months indefinitely                                                           |
| <b>EASL (2017)</b>                                                                           |                                                                                                                                    |
| <b>HBeAg+ populations</b>                                                                    | HBeAg seroconversion & at least 6-12 months of consolidation therapy following virological suppression                             |
| <b>HBeAg- populations</b>                                                                    | At least 3 years of consolidation therapy following virological suppression                                                        |
| <b>Follow-up</b>                                                                             | Close post-NA therapy monitoring required                                                                                          |
| <b>AASLD (2018)</b>                                                                          |                                                                                                                                    |
| <b>HBeAg+ populations</b>                                                                    | HBeAg seroconversion & at least 12 months of consolidation therapy following virological suppression                               |
| <b>HBeAg- populations</b>                                                                    | Indefinite treatment unless compelling rationale                                                                                   |
| <b>Follow-up</b>                                                                             | Follow-up every 3 months for at least 1 year                                                                                       |

Abbreviations: AASLD: American Association for the Study of Liver Diseases, APASL: Asian Pacific Association for the Study of the Liver, EASL: European Association for the Study of the Liver; HBeAg+: initial e-Antigen positive population; HBeAg-: initial e-Antigen negative population; HBsAg: hepatitis B surface antigen

**Table S2: Risk of Bias Assessment in Studies Exploring Viral Markers**

| <b>Paper</b>                                | <b>D1</b> | <b>D2</b> | <b>D3</b> | <b>D4</b> | <b>D5</b> | <b>D6</b> | <b>D7</b> | <b>Overall</b> |
|---------------------------------------------|-----------|-----------|-----------|-----------|-----------|-----------|-----------|----------------|
| <b>Honer Zu Siederdisen, C., et al 2016</b> | Moderate  | Low       | Low       | Low       | Low       | Low       | Serious   | Moderate       |
| <b>Hsu, Y.C., et al 2019</b>                | Moderate  | Low       | Low       | Low       | Moderate  | Low       | Moderate  | Moderate       |
| <b>Carey, I., et al 2020</b>                | Low       | Moderate  | Low       | Low       | Moderate  | Low       | Moderate  | Moderate       |
| <b>Fan, R., et al 2020</b>                  | Moderate  | Low       | Low       | Low       | Low       | Low       | Moderate  | Low            |
| <b>Fan, R., et al 2020B</b>                 | Moderate  | Low       | Low       | Low       | Low       | Low       | Moderate  | Low            |
| <b>Garcia-Lopez, M., et al 2020</b>         | Moderate  | Low       | Low       | Low       | Low       | Low       | Moderate  | Low            |
| <b>Kaewdech, A., et al 2020</b>             | Moderate  | Low       | Low       | Low       | Low       | Low       | Serious   | Moderate       |
| <b>Lai, C.L., et al 2020</b>                | Moderate  | Low       | Low       | Low       | Low       | Low       | Moderate  | Low            |
| <b>Liu, Y., et al 2020</b>                  | Moderate  | Moderate  | Low       | Low       | Moderate  | Low       | Moderate  | Moderate       |
| <b>Papatheodoridi, M., et al 2020</b>       | Moderate  | Low       | Low       | Low       | Moderate  | Low       | Moderate  | Moderate       |
| <b>Seto, W.K., et al 2020</b>               | Moderate  | Low       | Low       | Low       | Low       | Low       | Moderate  | Low            |
| <b>Tseng, T.N., et al 2020*</b>             | Moderate  | Low       | Low       | Low       | Moderate  | Low       | Moderate  | Moderate       |
| <b>Cheng, H.R., et al 2021</b>              | Moderate  | Low       | Low       | Low       | Low       | Low       | Moderate  | Low            |
| <b>Huang, P.Y., et al 2021</b>              | Moderate  | Low            |
| <b>Kuo, Y.H., et al 2021</b>                | Moderate  | Low            |
| <b>Liao, G., et al 2021</b>                 | Moderate  | Low       | Low       | Low       | Low       | Low       | Moderate  | Low            |
| <b>Sonneveld, M.J., et al 2022A</b>         | Moderate  | Low            |
| <b>Wubbolding, L.A., et al 2021</b>         | Moderate  | Low       | Low       | Low       | Low       | Low       | Serious   | Moderate       |
| <b>Xia, M., et al 2021</b>                  | Moderate  | Low            |
| <b>Xie, Y., et al 2021</b>                  | Moderate  | Low            |
| <b>Chen, C.H., et al 2022</b>               | Moderate  | Low       | Low       | Low       | Low       | Low       | Moderate  | Low            |
| <b>Kaewdech, A., et al 2022</b>             | Moderate  | Low       | Low       | Low       | Low       | Low       | Moderate  | Low            |
| <b>Papatheodoridi, M., et al 2022</b>       | Moderate  | Low       | Low       | Low       | Low       | Low       | Moderate  | Low            |
| <b>Sonneveld, M.J., et al 2022B</b>         | Moderate  | Low            |

Bias Domains included in the Robins-I tool

- D1: Bias due to confounding
- D2: Bias in selection of participants into the study
- D3: Bias in classification of interventions
- D4: Bias due to deviations from intended interventions
- D5: Bias due to missing data
- D6: Bias in measurement of the outcome
- D7: Bias in selection of the reported result

**Table S3: Comparison of HBV RNA Platforms**

| Paper                         | HBV RNA Platform                                                                                     | Lower Limit of Detection                 |
|-------------------------------|------------------------------------------------------------------------------------------------------|------------------------------------------|
| Carey, I., et al 2020         | m2000 system (Abbott Molecular)                                                                      | 1.65 log U/mL                            |
| Fan, R., et al 2020           | LightCycler 480 Instrument II system (Roche, Mannheim, Germany) with Taqman probe method             | 3 log U/mL                               |
| Fan, R., et al 2020           | LightCycler 480 Instrument II system (Roche, Mannheim, Germany) with Taqman probe method             | 3 log U/mL                               |
| Garcia-Lopez, et al 202       | TaqMan Fast Virus 1-Step Master Mix (Applied Biosystems, Thermo Fisher Scientific, Waltham, MA, USA) | 6 copies per reaction                    |
| Kaewdech, A., et al 202       | Droplet digital PCR (Bio-Rad, Hercules, CA, USA)                                                     | 2 log copies/mL                          |
| Lai, C.L., et al 202          | LightCycler 1.5 (Roche Applied Science, Mannheim, Germany)                                           | 800 copies/mL                            |
| Liu, Y., et al 202            | AutoSAT system (Rendu Biotechnology)                                                                 | 100 copies/mL                            |
| Seto, W.K., et al 202         | m2000 system (Abbott Molecular)                                                                      | 1.65 log U/mL                            |
| Xia, M., et al, 2021          | LightCycler 480 Instrument II system (Roche, Mannheim, Germany) with Taqman probe method             | 3 log U/mL                               |
| Xie, Y., et al 202            | ABI Prism 7500 Real-time PCR System (ABI, USA)                                                       | Not specified                            |
| Kaewdech, A., et al 202       | Droplet digital PCR (Bio-Rad, Hercules, CA, USA)                                                     | 2 log copies/mL                          |
| Papatheodoridi, M., et al 202 | LightCycler 1.5 (Roche Applied Science, Mannheim, Germany)                                           | 10 copies per reaction or 1320 copies/mL |
