# Supplementary material for: Utility of novel viral and immune markers in predicting HBV treatment endpoints: A systematic review of treatment discontinuation studies
Source: PubMed Central journal article supplement — JHEP Rep. 2023 Mar 8;5(6):100720. doi: 10.1016/j.jhepr.2023.100720 (PMC10149368; doi:10.1016/j.jhepr.2023.100720), 2023-03-08
Supplement: mmc5.pdf [file mmc5.pdf]

# Utility of novel viral and immune markers in predicting HBV treatment endpoints: A systematic review of treatment discontinuation studies

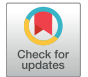

Georgia Zeng,<sup>1,†</sup> Apostolos Koffas,<sup>2,†</sup> Lung-Yi Mak,<sup>2,3,†</sup> Upkar S. Gill,<sup>2</sup> Patrick T.F. Kennedy<sup>2,\*</sup>

<sup>1</sup>Faculty of Medicine, St Vincent's Clinical School, University of New South Wales, Sydney, Australia; <sup>2</sup>Barts Liver Centre, Blizard Institute, Barts and The London School of Medicine and Dentistry, Queen Mary University of London, London, UK; <sup>3</sup>Department of Medicine, Queen Mary Hospital, School of Clinical Medicine, The University of Hong Kong, Hong Kong, China

JHEP Reports 2023. <https://doi.org/10.1016/j.jhepr.2023.100720>

**Background & Aims:** Antivirals represent the mainstay of chronic hepatitis B treatment given their efficacy and tolerability, but rates of functional cure remain low during long-term therapy. Treatment discontinuation has emerged as a strategy to maintain partial cure and achieve functional cure in select patient groups. We aimed to evaluate how data from treatment discontinuation studies exploring novel viral and/or immune markers could be applied to the functional cure program.

**Methods:** Treatment discontinuation studies evaluating novel viral and/or immune markers were identified by a systematic search of the PubMed database through to October 30, 2022. Data extraction focused on information regarding novel markers, including identified cut-off levels, timing of measurement, and associated effect on study outcomes of virological relapse, clinical relapse, and HBsAg seroclearance.

**Results:** From a search of 4,492 citations, 33 studies comprising a minimum of 2,986 unique patients met the inclusion criteria. Novel viral markers, HBcrAg and HBV RNA, were demonstrated across most studies to be helpful in predicting off-therapy partial cure, with emerging evidence to support a link with functional cure. From novel immune marker studies, we observed that treatment discontinuation has the potential to trigger immune restoration, which may be associated with a transient virological relapse. To this end, these studies support the combination of virus-directing agents with immunomodulator therapies to induce two key steps underlying functional cure: viral antigen load reduction and restoration of the host immune response.

**Conclusions:** Patients with a favourable profile of novel viral and immune markers stand to benefit from a trial of antiviral treatment discontinuation alongside novel virus-directing agents with the aim of achieving functional cure without excessive risk of severe clinical relapse.

**Impact and implications:** Select patients with chronic hepatitis B undergoing nucleoside analogue therapy may benefit from a trial of treatment discontinuation, aiming to maintain partial cure and/or achieve functional cure. We propose a profile of novel viral and immune markers to identify patients who are likely to achieve these goals without excessive risk of hepatic decompensation. Furthermore, treatment discontinuation may also be considered as a therapeutic strategy to trigger immune restoration, which may increase the chance of functional cure when used in conjunction with novel virus-directing agents.

© 2023 The Authors. Published by Elsevier B.V. on behalf of European Association for the Study of the Liver (EASL). This is an open access article under the CC BY-NC-ND license (<http://creativecommons.org/licenses/by-nc-nd/4.0/>).

## Introduction

An estimated 296 million individuals are known to have chronic hepatitis B (CHB) worldwide, with 30% of the global population showing serological evidence of current or past infection.<sup>1,2</sup> CHB resulted in an estimated 820,000 deaths in 2019 according to the World Health Organization (WHO), the vast majority of which are attributable to cirrhosis and hepatocellular carcinoma (HCC).<sup>3</sup> Current CHB treatment aims primarily to prevent disease

progression and the sequelae of chronic infection by providing continuous on-treatment viral suppression.

First-line antivirals, entecavir (ETV), tenofovir disoproxil fumarate (TDF), and tenofovir alafenamide (TAF) represent the mainstay of treatment given their efficacy, tolerability, and favourable safety profile; moreover they are distinguished by their high barriers to resistance in addition to their ability to reverse liver fibrosis and reduce HCC incidence.<sup>4,5</sup> Treatment with nucleoside analogues (NAs) is lifelong in the majority of patients. This is in contrast to treatment with interferon-alpha, the only recognised finite therapy in CHB, used in a small subset of patients only, because of its recognised systemic side effects. NAs lack the potential to achieve functional cure, defined as sustained off-treatment HBsAg loss, in the majority of CHB patients. The persistence of HBV infection is attributed to the cccDNA pool in infected hepatocytes; although it reduces naturally over the

Keywords: Hepatitis B virus; Antiviral agents; Biomarkers; Immune reconstitution. Received 6 January 2023; accepted 6 February 2023; available online 8 March 2023

<sup>†</sup> Co-first authors.

\* Corresponding author. Address: Department of Immunobiology, The Blizard Institute, Barts and The London School of Medicine and Dentistry, Queen Mary University of London, London, UK.

E-mail address: [p.kennedy@qmul.ac.uk](mailto:p.kennedy@qmul.ac.uk) (P.T.F. Kennedy).

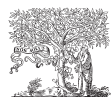

ELSEVIER

course of HBV infection,<sup>6</sup> it persists even in patients with viral clearance.<sup>7</sup>

Novel therapeutic approaches for the management of CHB have been under evaluation to overcome these limitations. These comprise a number of promising agents or combination approaches currently being evaluated in pre-clinical or early-phase clinical trials, which target either the viral cycle directly or enhance host immunity. The former group includes viral entry inhibitors, RNA interference, capsid assembly modulators, nucleic acid polymers, strategies targeting cccDNA formation or degradation, amongst others. Examples of the latter group include therapeutic vaccines, toll-like receptor agonists, T cell redirection, checkpoint inhibitors, antibodies to HBV and indeed NA discontinuation. Recently, considerable focus has been given to NA discontinuation as a strategy to achieve functional cure. However, there is a lack of consensus between international guidelines<sup>8–10</sup> regarding the requirements for safe NA cessation in CHB patients (Table S1). Secondly, patients often experience viral relapse (VR), defined as a rebound of HBV DNA levels following treatment cessation; and clinical relapse (CR), defined by VR with an associated biochemical flare. Off-therapy rates of VR and CR vary largely between published studies, likely owing to heterogeneity in study participants, relapse definitions and other aspects of study design. In a recent meta-analysis by Hall *et al.*<sup>11</sup> in 2021 which explored rates of partial cure following discontinuation of oral antivirals in HBeAg-negative patients, rates of VR and CR at 12 months were 63% and 35%, respectively.

Although treatment discontinuation can be considered a therapeutic strategy in its own right with the potential to offer partial and functional cure in some patients, studies of NA discontinuation can also provide unique insights into the virological and immunological conditions required to achieve both partial and functional cure. Several discontinuation studies assessed novel viral markers such as HBcrAg and HBV RNA, and both have been proposed as novel tools to signpost partial and functional cure after NA cessation. Additionally, immune markers, particularly relating to T cell phenotype and function, are differentiated in patient populations who progress to VR and/or CR. Thus, we seek to comprehensively review the data generated to date on novel viral and immune markers in treatment discontinuation studies, aiming to evaluate their potential in providing a roadmap to functional cure.

## Materials and methods

### Literature search

We performed a systematic review according to the Preferred Reporting Items for Systematic Reviews and Meta-Analyses (PRISMA) guidelines.<sup>12</sup> To retrieve all works of potential relevance, a systematic search of the PubMed/Medline database was performed of all studies through to October 30, 2022. The search used the terms ('Hepatitis B' OR 'Chronic Hepatitis B') AND ('Antiviral' OR 'Treatment' OR 'Therapy' OR 'Lamivudine' OR 'Adefovir' OR 'Entecavir' OR 'Telbivudine' OR 'Tenofovir') AND ('End' OR 'Discontinuation' OR 'Withdrawal' OR 'Cessation' OR 'Off-treatment') which were searched as text words and as exploded medical subject headings where possible, with no language restrictions. The reference lists of relevant articles were also searched for appropriate studies. We requested full texts from authors where we found relevant paper abstracts and conference abstracts. A search for unpublished literature was not performed.

### Inclusion criteria

We included randomised or observational studies that met the following inclusion criteria: (1) studies including adult CHB patients who ceased NA only if fulfilling the following standards: HBeAg seroconversion and a minimum mean/median of 6 months of consolidation therapy following virological suppression for initial HBeAg-positive populations, and a minimum median/mean of 12 months of consolidation therapy following virological suppression for initial HBeAg-negative populations, without HBsAg seroclearance; (2) studies providing data in the form of virological and/or clinical relapse rates; (3) studies providing data relating to novel viral and/or immune markers; (4) studies with a minimum follow up of 6 months; (5) studies with a minimum of 10 patients; (6) studies available in English as full papers.

### Exclusion criteria

We excluded studies with (1) populations co-infected with HCV or HIV; (2) studies with populations with a history of HCC, liver transplants, or immunosuppressive therapies, (3) studies with populations co-treated with interferon; (4) studies with populations that have exclusively experienced HBsAg seroclearance.

### Data extraction

The baseline characteristics of study cohort including age, sex, type of NA, HBeAg status, HBV genotype, and duration of NA were extracted. For each article included, we recorded the author names, year of publication, country of origin, study design, and duration of follow-up. Study outcomes of VR and CR (both regarded as not achieving partial cure) and HBsAg seroclearance (functional cure) as defined in each article were recorded. Regarding novel viral biomarkers, HBcrAg and HBV RNA, the identified cut-off levels, and timing of measurement were presented alongside the associated effect estimates on study outcomes, expressed as either hazard ratios (HRs), odds ratios (ORs), or cumulative rate of study outcomes. Data regarding novel immune markers, namely the phenotype and function of peripheral immune cells, were harvested in the form supplied by the authors.

### Quality assessment

For viral markers, the Risk of Bias in Non-Randomized Studies of Interventions (ROBINS-I) assessment tool was used to evaluate study quality, and is available in the [Supplementary materials](#). The judgements within each domain of the tool were carried forward to an overall risk of bias judgement, categorised as low, moderate, serious, or critical. Studies judged to be at critical risk of bias were not included in the analysis. For immune markers, because of the heterogeneous and complex nature of the immunological analyses, no well-established scale could be applied. Two authors (GZ) and (AK) screened the abstracts and selected relevant studies after screening the retrieved full articles. Conflicts of study eligibility or quality assessment were resolved by discussion with a senior author (PTFK).

## Results

### Characteristics of included studies

The search identified 4,492 titles and abstracts that were reviewed, with 41 citations being selected for full-text review. Of these, eight studies were excluded after rigorous review. The stopping criteria in seven of these studies did not meet the minimum requirements as per our inclusion criteria and we

could not source the full text of another study. Therefore, we evaluated 33 studies,<sup>13–45</sup> which provided data for a minimum of 2,986 unique patients undergoing treatment cessation. Sonneveld's 2021 and 2022 studies<sup>31,45</sup> extracted data from the CREATE database, which pooled cohorts from previous studies in Asia and Europe that were already included in this meta-analysis.<sup>16,17,21,24,25,43,44</sup> In addition, Fan *et al.* published two included studies<sup>18,19</sup> with the same cohort, a different Chinese group published two included studies with likely overlapping cohorts,<sup>15,33</sup> and a Taiwanese group published four included studies with likely overlapping cohorts.<sup>26,28,29,41</sup> Distinct data on initial e-Antigen-positive populations was provided in five studies, 14 studies provided distinct data on initial e-Antigen-negative populations and 14 studies provided data on combined e-Antigen-positive and e-Antigen-negative populations. Twenty-two studies were conducted in Asian-dominant populations, four studies were conducted in Caucasian-dominant populations, three studies reported on Mediterranean-dominant populations, one study was conducted in a Black African-dominant population and three studies were conducted in heterogenous populations. Fig. 1 displays our study selection process.

The undetectable limit of HBV DNA in the majority of studies was 20 IU/ml (100 copies/ml), but varied from 10 to 100 IU/ml. When specified, the definition of VR was set at HBV DNA >2,000 IU/ml in all but one study,<sup>38</sup> which utilised the threshold of HBV DNA >20,000 IU/ml. The definition CR was set as alanine aminotransferase (ALT) >2 × upper limit of normal (ULN) in all studies that specified a threshold, but one study specifically looked at severe hepatitis flares, defined as ALT >10 × ULN.<sup>42</sup> The definition of VR and CR in some studies was qualified by multiple time points, for example VR being defined as HBV DNA >2,000 IU/ml verified on two separate occasions 3 months apart. The main study characteristics of these studies are summarised in

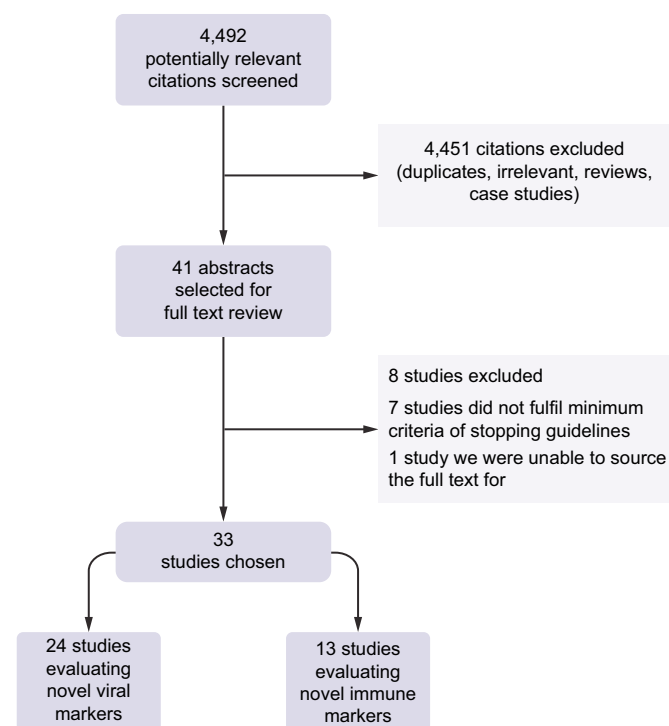

Fig. 1. Study selection process.

Tables 1 and 2, and the patient and treatment characteristics of these studies are summarised in Tables 3 and 4.

### Novel viral markers

#### HBcrAg and partial cure

The association between HBcrAg and VR was evaluated in 14 studies (Table 5), four of which produced significant multivariate HRs.<sup>30,31,34,41</sup> At the end of treatment (EOT) HBcrAg cut-off of 4 log U/ml in HBeAg-positive populations, Liao *et al.*<sup>30</sup> demonstrated a multivariate HR 1.73 (1.06–2.80,  $p < 0.027$ ) for 5-yr VR, whereas Xie *et al.*<sup>34</sup> demonstrated a multivariate OR of 3.70 (1.61–8.49,  $p = 0.002$ ) for 2-yr VR. Furthermore, a recent large-scale study pooling European and Asian cohorts<sup>31</sup> (including both HBeAg-positive and HBeAg-negative patients) reported that lower EOT HBcrAg levels were significantly associated with higher rates of virological remission/response with multivariate OR 0.73 per log U/ml (0.62–0.86,  $p < 0.001$ ). Seven studies reported the cumulative rates of VR stratified by the level of baseline or EOT HBcrAg, with varying observation periods and cut-off levels of HBcrAg (Fig. 2A). For instance, Tseng *et al.*<sup>26</sup> demonstrated significantly different 5-yr VR rates of 23.8% vs. 53% in patients with baseline HBcrAg <4 log U/ml and >4 log U/ml respectively ( $p = 0.001$ ), yet returning no significant findings when exploring EOT HBcrAg, in a majority HBeAg-negative population. Huang *et al.*<sup>28</sup> also found that baseline HBcrAg at the cut-off 4 log U/ml was a significant predictor for VR in their HBeAg-negative population, whereas EOT HBcrAg was not.

There was a stronger relationship between HBcrAg and CR, as evaluated in 13 studies (Table 5). Fan *et al.*<sup>19</sup> demonstrated a multivariate HR of 5.70 (1.37–23.67;  $p = 0.017$ ) between patients with EOT HBcrAg >4 log U/ml and <4 log U/ml, with five other studies encompassing HBeAg-positive, HBeAg-negative and combined populations also producing significant multivariate HRs at EOT HBcrAg cut-off levels ranging from 2 to 4 log U/ml.<sup>16,19,21,30,31,41</sup> These results were affirmed by the CREATE study group,<sup>31</sup> who reported that lower EOT HBcrAg levels were significantly associated with lower rates of CR with multivariate OR 1.29 per log U/ml (1.08–1.54,  $p = 0.005$ ). Eight studies reported the cumulative rates of CR stratified by various cut-off levels of HBcrAg at baseline or EOT (Fig. 2A). Once again, both Tseng *et al.*<sup>26</sup> and Huang *et al.*<sup>28</sup> found that 5-yr CR rates differed significantly when separating patients at the baseline HBcrAg cut-off of 4 log U/ml. Papatheodoridi *et al.*<sup>24</sup> found that EOT HBcrAg was significantly associated with retreatment (a composite endpoint suggestive of CR) in a HBeAg-negative population, where the 2-yr retreatment rates were 45% and 17% in patients with EOT HBcrAg >2 and <2 log U/ml respectively, alongside a multivariate HR of 3.64 (1.23–10.75;  $p = 0.019$ ) regarding retreatment with this cut-off level.

Overall, HBeAg-positive populations demonstrate higher mean/median EOT HBcrAg levels, and the EOT cut-off of HBcrAg of 4 log U/ml is a reliable predictor of both VR and CR. HBeAg-negative and combined populations necessitate a lower cut-off level, ranging from 2 to 3.3 log U/ml in the included studies (noting that the validated lower limit of detection is 3 log U/ml). The risk of VR/CR in populations that have a mean/median EOT HBcrAg level at or below 3 log U/ml may be better distinguished by a baseline HBcrAg cut-off of 4 log U/ml.

#### HBcrAg and functional cure

Fourteen studies evaluated the association between HBcrAg and rates of HBsAg loss, with most studies not returning significant

**Table 1. Main characteristics of included studies (n = 24) exploring the role of viral markers in prediction of partial cure.**

| Paper                                                | Study design              | Population | Location (Ethnicity if different) | Sample size | Novel viral markers | VR definition (HBV DNA)        | CR definition (ALT)                          | Retreatment criteria                                                                                                                               | Follow-up (months) |
|------------------------------------------------------|---------------------------|------------|-----------------------------------|-------------|---------------------|--------------------------------|----------------------------------------------|----------------------------------------------------------------------------------------------------------------------------------------------------|--------------------|
| Höner Zu Siederdisen, C., et al., 2016 <sup>13</sup> | Prospective               | HBeAg-     | Germany                           | 15          | HBcrAg              | 2,000 IU/ml                    | N/A                                          | VR                                                                                                                                                 | 12                 |
| Hsu, Y.C., et al., 2019 <sup>16</sup>                | Prospective               | Combined   | Taiwan                            | 135         | HBcrAg              | 2,000 IU/ml                    | ×2 ULN (ULN = 40)                            | Bili >2 mg/dl, PT >3 s, or ALT >2 × ULN [3 months apart]                                                                                           | 25.9               |
| Carey, I., et al., 2020 <sup>17</sup>                | Retrospective             | HBeAg-     | UK (mostly Black African)         | 23          | HBcrAg<br>HBV RNA   | N/A                            | ×2 ULN (ULN = 19 F, 30 M) [on two occasions] | 'Clinically significant flare'                                                                                                                     | 17.9               |
| Fan, R., et al., 2020A <sup>18</sup>                 | Prospective               | HBeAg+     | China                             | 170         | HBV RNA             | 2,000 IU/ml [3-4 months apart] | ×2 ULN                                       | CR                                                                                                                                                 | 48                 |
| Fan, R., et al., 2020B <sup>19</sup>                 | Prospective               | HBeAg+     | China                             | 186         | HBcrAg<br>HBV RNA   | 2,000 IU/ml [3-4 months apart] | ×2 ULN                                       | CR                                                                                                                                                 | 48                 |
| García-López, M., et al., 2020 <sup>20</sup>         | Prospective               | HBeAg-     | Spain                             | 27          | HBcrAg<br>HBV RNA   | 2,000 IU/ml                    | Not stated                                   | ALT >10 × ULN [on two occasions], ALT >5-10 × ULN and VR [4 wk apart], or ALT >2-5 × ULN and VR [6 months apart]                                   | 34                 |
| Kaewdech, A., et al., 2020 <sup>21</sup>             | Prospective               | Combined   | Thailand                          | 92          | HBcrAg<br>HBV RNA   | 2,000 IU/ml                    | >2 × ULN (ULN = 33)                          | ALT >10 × ULN, ALT >2-10 × ULN [4 wk apart], Bili >1.5 mg/dl or PT >2 s                                                                            | 12                 |
| Lai, C.L., et al., 2020 <sup>22</sup>                | Prospective               | Combined   | Hong Kong                         | 13          | HBcrAg<br>HBV RNA   | 2,000 IU/ml                    | —                                            | VR                                                                                                                                                 | 17.5               |
| Liu, Y., et al., 2020 <sup>23</sup>                  | Prospective               | Combined   | China                             | 30          | HBV RNA             | 2,000 IU/ml [3 months apart]   | ×2 ULN                                       | CR                                                                                                                                                 | 24                 |
| Papatheodoridi, M., et al., 2020 <sup>24</sup>       | Prospective               | HBeAg-     | Greece                            | 57          | HBcrAg              | 2,000 IU/ml                    | ×2 ULN (ULN = 40)                            | ALT >10×ULN, ALT >2 × ULN and DNA >100,000 IU/ml or ALT >2 × ULN and DNA >2,000 IU/ml [on three occasions]                                         | 19                 |
| Seto, W.K., et al., 2020 <sup>25</sup>               | Prospective               | Combined   | Hong Kong                         | 114         | HBcrAg<br>HBV RNA   | 2,000 IU/ml [1 wk apart]       | N/A                                          | VR                                                                                                                                                 | 12                 |
| Tseng, T.N., et al., 2020 <sup>26</sup>              | Not specified             | Combined   | Taiwan                            | 135         | HBcrAg              | 2,000 IU/ml                    | >80                                          | HBeAg+: ALT >2 × ULN and DNA >20,000 IU/ml<br>HBeAg-: ALT >2 × ULN [3 months apart] and DNA >2,000 IU/ml<br>All patients: Bili >2 mg/dl or PT >3 s | 135                |
| Cheng, H.R., et al., 2021 <sup>27</sup>              | Prospective               | HBeAg-     | Taiwan                            | 54          | HBcrAg              | 2,000 IU/ml                    | —                                            | Not mentioned                                                                                                                                      | 12                 |
| Huang, P.Y., et al., 2021 <sup>28</sup>              | Not specified             | HBeAg-     | Taiwan                            | 301         | HBcrAg              | 2,000 IU/ml                    | ×2 ULN (ULN = 40)                            | ALT >2× ULN [3 months apart] and DNA >2,000 IU/ml, Bili >2 mg/dl or PT >3 s                                                                        | 56.3               |
| Kuo, Y.H., et al., 2021 <sup>29</sup>                | Retrospective             | HBeAg-     | Taiwan                            | 185         | HBcrAg              | 2,000 IU/ml                    | ×2 ULN                                       | ALT >2× ULN [3 months apart] and DNA >2,000 IU/ml, Bili >2 mg/dl or PT >3 s                                                                        | 35.5               |
| Liao, G., et al., 2021 <sup>30</sup>                 | Prospective               | HBeAg+     | China                             | 122         | HBcrAg              | 2,000 IU/ml                    | ×2 ULN (ULN = 40)                            | CR                                                                                                                                                 | 36                 |
| Sonneveld, M.J., et al., 2021 <sup>31</sup>          | Retrospective/prospective | Combined   | Multicentre (Asia and Europe)     | 572         | HBcrAg              | 2,000 IU/ml                    | ×3 ULN                                       | Not specified                                                                                                                                      | 12                 |
| Wübbolding, L.A., et al., 2021 <sup>32</sup>         | Prospective               | HBeAg-     | Asia Pacific                      | 43          | HBcrAg              | 2,000 IU/ml                    | —                                            | No specified                                                                                                                                       | 6                  |
| Xia, M., et al., 2021 <sup>33</sup>                  | Prospective               | Combined   | China                             | 135         | HBV RNA             | 2,000 IU/ml                    | ×2 ULN                                       | CR                                                                                                                                                 | 31.2               |
| Xie, Y., et al., 2021 <sup>34</sup>                  | Prospective               | HBeAg+     | China                             | 139         | HBcrAg<br>HBV RNA   | 2,000 IU/ml                    | ×2 ULN (ULN = 40)                            | CR                                                                                                                                                 | 24                 |
| Chen, C.H., et al., 2022 <sup>41</sup>               | Prospective               | HBeAg+     | Taiwan                            | 316         | HBcrAg              | 2,000 IU/ml                    | ×2 ULN (ULN = 40)                            | Not specified                                                                                                                                      | ETV 42<br>TDF 19   |

(continued on next page)



Table 1 (continued)

| Paper                                                  | Study design                  | Population | Location (Ethnicity if different)   | Sample size | Novel viral markers | VR definition (HBV DNA) | CR definition (ALT) | Retreatment criteria                                                                                                                                        | Follow-up (months) |
|--------------------------------------------------------|-------------------------------|------------|-------------------------------------|-------------|---------------------|-------------------------|---------------------|-------------------------------------------------------------------------------------------------------------------------------------------------------------|--------------------|
| Kaewdech, A., <i>et al.</i> , 2022 <sup>43</sup>       | Prospective                   | Combined   | Thailand                            | 92          | HBcrAg<br>HBV RNA   | 2,000 IU/ml             | >2 × ULN (ULN = 33) | CR and:<br>Bili >1.5 mg/dl,<br>PT >2 s, ALT >10 × ULN,<br>or ALT 2–10 × ULN<br>[4 wk apart]                                                                 | 35.5               |
| Papatheodoridi, M., <i>et al.</i> , 2022 <sup>44</sup> | Prospective                   | HBeAg-     | Greece                              | 57          | HBcrAg<br>HBV RNA   | 2,000 IU/ml             | ×2 ULN (ULN = 40)   | ALT >10 × ULN,<br>ALT >5 × ULN and<br>Bili >2 mg/dl,<br>ALT >2 × ULN and<br>DNA <100,000 IU/ml,<br>ALT >ULN and<br>DNA >2,000 IU/ml<br>[on three occasions] | 38                 |
| Sonneveld, M.J., <i>et al.</i> , 2022 <sup>45</sup>    | Retrospective/<br>prospective | Combined   | Multicentre<br>(Asia and<br>Europe) | 1,216       | HBcrAg              | —                       | —                   | Not specified                                                                                                                                               | 25.6               |

Anti-HBc, hepatitis B core antibodies; ALT, alanine transaminase; Bili, bilirubin; CR, clinical relapse; ETV, entecavir; F, female; HBcrAg, hepatitis B core-related antigen; HBeAg+, initial e-Antigen-positive population; HBeAg-, initial e-Antigen-negative population; HBV DNA, hepatitis B virus deoxyribonucleic acid; HBV RNA, hepatitis B virus ribonucleic acid; M, male; PT, prothrombin time; ULN, upper limit of normal; VR, virological relapse.

results (Table 5). Five studies reported the cumulative rates of functional cure stratified by baseline or EOT HBcrAg levels (Fig. 2A). Only four of 12 patients in Liao *et al.*'s study<sup>30</sup> achieving HBsAg loss had undetectable EOT HBcrAg. Kaewdech *et al.*<sup>21</sup> found a near-significant difference in 48-wk HBsAg seroclearance rates, 5.9% vs. 0% in patients with EOT HBcrAg <3 log U/ml and >3 log U/ml respectively ( $p = 0.062$ ). Interestingly, Höner Zu Siederdisen *et al.*<sup>13</sup> demonstrated that HBsAg reduction and seroclearance was associated with the degree of virological relapse. The extent of increase in HBcrAg (in parallel with HBV DNA rebound) at Weeks 4–8 post-treatment cessation correlated with HBsAg decline and were followed by HBsAg loss in three of 15 patients. Carey *et al.*<sup>17</sup> also found that a steeper HBsAg decline post-treatment correlated with lower baseline HBcrAg levels rather than EOT levels, observing transiently resolving elevations of HBcrAg after NA cessation. Recently, a multicentre study<sup>45</sup> comprising 1,216 patients demonstrated that EOT HBcrAg was significantly associated with the probability of HBsAg loss (multivariate HR per log U/ml 0.729, 0.603–0.882,  $p = 0.001$ ).

#### HBV RNA and partial cure

Eight studies explored the association between HBV RNA levels and rates of VR (Table 5). Five studies reported the cumulative rates of VR at various observation periods stratified by EOT RNA levels (Fig. 2B). For instance, Kaewdech *et al.*<sup>21</sup> initially reported significantly different 48-wk VR rates of 50% and 72% in patients with EOT HBV RNA <2 and >2 log U/ml, respectively ( $p = 0.048$ ), yet the effect of HBV RNA on both VR and CR was found to be statistically insignificant in their subsequent publication with longer follow-up (median 35.5 months) when adjusted for SCALE-B strata.<sup>43</sup> Liu *et al.*<sup>23</sup> did not find a significant association between HBV RNA and VR, but Seto *et al.*<sup>25</sup> demonstrated a multivariate HR of 2.96 (1.78–4.93;  $p = 0.001$ ) between combined HBeAg-positive and HBeAg-negative patients at RNA cut-off level of 1.65 log U/ml. Papatheodoridi *et al.*<sup>44</sup> found that detectability of EOT HBV RNA was significantly associated with VR in their HBeAg-negative population, quoting a HR of 3.20 (1.10–9.32  $p = 0.033$ ), as was detectability of HBV RNA detection at 1 month post-EOT (HR 3.23, 1.57–6.67,  $p = 0.001$ ). Similarly, Xie *et al.*<sup>34</sup> demonstrated a multivariate OR of 3.453 (1.387–8.597;  $p = 0.008$ ) between patients with positive vs. negative RNA detection

in their HBeAg-positive population. Furthermore, Lai *et al.*,<sup>22</sup> who demonstrated high VR rates in patients with undetectable cccDNA and RNA, found that all but one patient continued to exhibit undetectable HBV RNA levels after relapse.

Eight out of 10 relevant studies affirmed a significant association between HBV RNA and CR (Table 5). Six studies reported the cumulative rates of CR at various observation periods stratified by EOT RNA levels (Fig. 2B). For instance, Fan *et al.*<sup>19</sup> demonstrated a multivariate HR of 3.58 (1.26–10.14;  $p = 0.017$ ) between HBeAg-positive patients with EOT RNA >3 and <3 log U/ml, alongside significantly different 4-yr CR rates of 12.9% vs. 40.1% according to that cut-off ( $p = 0.004$ ). Liu *et al.*<sup>23</sup> also reported significantly different 2-yr CR rates of 17.5% vs. 38.3% in patients who were HBV RNA negative and positive, respectively (combined HBeAg-positive and HBeAg-negative population). Papatheodoridi *et al.*<sup>44</sup> also found that detectability of EOT HBV RNA was significantly associated with CR (HR of 4.73, 1.51–14.86,  $p = 0.008$ ). Carey *et al.*<sup>17</sup> demonstrated transient elevations in HBV RNA after NA cessation and found that three of four patients who demonstrated CR had RNA levels >1.65 log U/ml (75% sensitivity, 100% specificity, 100% PPV).

In conclusion, HBV RNA demonstrates utility in predicting both VR and CR in the majority of publications. There is less of a distinction in mean EOT RNA levels and preferred RNA cut-offs between HBeAg-positive, HBeAg-negative and combined populations when compared with the corresponding HBcrAg findings. This is in part because of a lack of standardisation of RNA assays between different study groups.

#### HBV RNA and functional cure

The relationship between HBV RNA and HBsAg loss was not reported in most studies. Only two studies reported the cumulative rates of functional cure stratified by EOT RNA levels (Fig. 2B). Kaewdech *et al.*<sup>21</sup> reported a non-significant difference in 48-wk clearance rates between patients with RNA <2 and >2 log U/ml, and Seto *et al.*<sup>25</sup> also reported a non-significant HR associated with seroclearance. However, García-López *et al.*<sup>20</sup> found that EOT HBV RNA was more frequently undetectable in patients who achieved HBsAg loss than in patients who did not (88% vs. 47%,  $p = 0.053$ ). Xia *et al.*<sup>33</sup> also found that cumulative incidence of 6-yr HBsAg clearance rates was 30.9% vs.

**Table 2. Main characteristics of included studies (n = 13) exploring the role of immune markers in prediction of partial cure.**

| Paper                                                                                                                                                                  | Study design | Population | Location (ethnicity if different)                             | Sample size | Immune marker explored                                                                                                                  | VR definition (HBV DNA) | CR definition (ALT)       | Retreatment criteria                                                                                             | Follow-up (months)         |
|------------------------------------------------------------------------------------------------------------------------------------------------------------------------|--------------|------------|---------------------------------------------------------------|-------------|-----------------------------------------------------------------------------------------------------------------------------------------|-------------------------|---------------------------|------------------------------------------------------------------------------------------------------------------|----------------------------|
| Höner Zu Siederdisen, C., <i>et al.</i> , 2016 <sup>13</sup><br>Rinker, F., <i>et al.</i> , 2018 <sup>35</sup><br><br>Zimmer, C.L., <i>et al.</i> , 2018 <sup>36</sup> | Prospective  | HBeAg-     | Germany                                                       | 15          | 27 plasma cytokine levels<br><br>HBV-specific T cell activity, phenotype, and function of T cells<br>Phenotype and function of NK cells | 2,000 IU/ml             | –                         | VR                                                                                                               | 12                         |
| Rivino, L., <i>et al.</i> , 2018 <sup>37</sup>                                                                                                                         | Prospective  | HBeAg-     | Cohort 1 – UK (heterogeneous ethnicity)<br>Cohort 2 – SE Asia | 46          | HBV-specific T cell activity, phenotype, and function of peripheral immune cells, 579 gene expression levels                            | N/A                     | ×2 ULN (ULN = 40)         | Not specified                                                                                                    | Cohort 1–6<br>Cohort 2–8.8 |
| Su, T.H., <i>et al.</i> , 2018 <sup>14</sup>                                                                                                                           | Prospective  | Combined   | Taiwan                                                        | 100         | SNPs, anti-HBc activity                                                                                                                 | 2,000 IU/ml             | ×2 ULN (ULN = 40)         | ALT >2 × ULN [3 months apart] and:<br>DNA >2,000 IU/ml or Bili >2 mg/dl or PT >3 s                               | 35                         |
| Chi, H., <i>et al.</i> , 2019 <sup>15</sup>                                                                                                                            | Prospective  | Combined   | China                                                         | 100         | Anti-HBc                                                                                                                                | 2,000 IU/ml             | ×2 ULN (ULN = 35 F, 40 M) | CR                                                                                                               | 30                         |
| Kranidioti, H., <i>et al.</i> , 2019 <sup>38</sup>                                                                                                                     | Prospective  | HBeAg-     | Greece                                                        | 23          | 21 key gene expression levels                                                                                                           | 20,000 IU/ml            | N/A                       | Not specified                                                                                                    | 55.2                       |
| Wu, Y., <i>et al.</i> , 2019 <sup>39</sup>                                                                                                                             | Prospective  | Combined   | China                                                         | 106         | SNPs, CXCR5 T cell activity, plasma CXCL13 levels                                                                                       | 2,000 IU/ml             | ×2 ULN                    | Not specified                                                                                                    | 23                         |
| Xie, L., <i>et al.</i> , 2019 <sup>40</sup>                                                                                                                            | Prospective  | Combined   | China                                                         | 91          | Plasma sST2 levels                                                                                                                      | 2,000 IU/ml             | ×2 ULN                    | CR                                                                                                               | 12                         |
| García-López, M., <i>et al.</i> , 2020 <sup>20</sup>                                                                                                                   | Prospective  | HBeAg-     | Spain                                                         | 27          | Global and HBV-specific T cell activity                                                                                                 | 2,000 IU/ml             | –                         | ALT >10 × ULN [on two occasions], ALT >5–10 × ULN and VR [4 wk apart], or ALT >2–5 × ULN and VR [6 months apart] | 34                         |
| Papatheodoridi, M., <i>et al.</i> , 2020 <sup>24</sup>                                                                                                                 | Prospective  | HBeAg-     | Greece                                                        | 57          | Plasma IP-10 levels                                                                                                                     | 2,000 IU/ml             | ×2 ULN (ULN = 40)         | ALT >10 × ULN, ALT >2 × ULN and DNA >100,000 IU/ml or ALT >2 × ULN and DNA >2,000 IU/ml [on three occasions]     | 19                         |
| Wübbolding, L.A., <i>et al.</i> , 2021 <sup>32</sup>                                                                                                                   | Prospective  | HBeAg-     | Asia Pacific                                                  | 43          | Plasma cytokine, chemokine and growth factor levels                                                                                     | 2,000 IU/ml             | –                         | Not specified                                                                                                    | 6                          |
| Hall, S.A.H., <i>et al.</i> , 2022 <sup>42</sup>                                                                                                                       | Prospective  | HBeAg-     | Australia (mostly Asian)                                      | 29          | TLR signalling and TLR/NK receptor expression                                                                                           | –                       | ×10 ULN (severe flare)    | Not specified                                                                                                    | 24                         |

ALT, alanine transaminase; Bili, bilirubin; CR, clinical relapse; F, female; HBeAg+, initial e-Antigen-positive population; HBeAg-, initial e-Antigen-negative population; M, male; PT, prothrombin time; SNP, single nucleotide polymorphism; ULN, upper limit of normal; VR, virological relapse.

**Table 3. Patient and treatment characteristics in studies exploring the role of viral markers in prediction of partial and functional cure; stratified by HBeAg status.**

| Paper                                                                                           | Total patients | Age              | Male | Genotype                          | Nucleoside analogue                                       | EOT HBsAg (log IU/ml)                         | TTT (months)         | CT (months)              | VR  | CR  | HBsAg loss | Follow-up (months) |
|-------------------------------------------------------------------------------------------------|----------------|------------------|------|-----------------------------------|-----------------------------------------------------------|-----------------------------------------------|----------------------|--------------------------|-----|-----|------------|--------------------|
| <b>HBeAg-positive populations</b>                                                               |                |                  |      |                                   |                                                           |                                               |                      |                          |     |     |            |                    |
| Fan, R., <i>et al.</i> , 2020A <sup>18</sup> and Fan, R., <i>et al.</i> , 2020B <sup>19,*</sup> | 127            | 30.8             | 94   | B 57, C 73                        | LdT ± ADV                                                 | 3.1                                           | 35.7                 | 20.4                     | 59  | 34  | 1          | 48                 |
| <i>Derivation cohort</i>                                                                        |                |                  |      |                                   |                                                           |                                               |                      |                          |     |     |            |                    |
| <i>Evaluation cohort</i>                                                                        | 59             | 36               | 46   | .                                 | ETV/TDF                                                   | 2.6                                           | 54                   | 28.2                     |     |     | 6          | 66                 |
| Liao, G., <i>et al.</i> , 2021 <sup>30</sup>                                                    | 122            | 34               | 95   | B/C 40                            | ETV/TDF 71, other 51                                      | 2.52                                          | 56.4                 | 30                       |     | 44  | 12         | 36                 |
| Xie, Y., <i>et al.</i> , 2021 <sup>34</sup>                                                     | 139            | 36               | 81   | .                                 | ETV 99, TDF 16, other 24                                  | 3.2                                           | 76.8                 | 69.6                     | 70  | 34  | 13         | 24                 |
| Chen, C.H., <i>et al.</i> , 2022 <sup>41</sup>                                                  | 316            | ETV 40<br>TDF 42 | 216  | B 172, C 144                      | ETV 205, TDF 111                                          | ETV 3.0<br>TDF 2.9                            | ETV 46.0<br>TDF 46.2 | ETV 25<br>TDF 25.8       | 206 | 166 | 15         |                    |
| <b>HBeAg-negative populations</b>                                                               |                |                  |      |                                   |                                                           |                                               |                      |                          |     |     |            |                    |
| Höner Zu Siederdisen, C., <i>et al.</i> , 2016 <sup>13</sup>                                    | 15             | 49.1             | 12   | B 3, C 1, D 9                     | –                                                         | 3.1                                           | >36                  | >36                      | 13  | –   | 3          | 12                 |
| Carey, I., <i>et al.</i> , 2020 <sup>17</sup>                                                   | 23             | 48               | 14   | A 4, B 3, C 1, D 5, E 10          | TDF 19, ETV 4                                             | 3.4                                           | 82.8                 | >36                      | –   | 14  | 0          | 17.9               |
| García-López, M., <i>et al.</i> , 2020 <sup>20</sup>                                            | 27             | 56               | 21   | A 3, C 1, D 21, F 2               | TDF 20, ETV 7                                             | 2.6                                           | 96                   | >36                      | 21  | 17  | 8          | 34                 |
| Papathodoridi, M., <i>et al.</i> , 2020 <sup>24</sup>                                           | 57             | 60               | 37   | Mainly D                          | ETV 18, TDF 39                                            | 2.8                                           | >96                  | 63.6                     | 42  | 19  | 14         | 19                 |
| Cheng, H.R., <i>et al.</i> , 2021 <sup>27</sup>                                                 | 54             | 51.3             | 42   | B 54                              | ETV 34, TDF 20                                            | 2.46                                          | 37.2                 | >12                      | 39  | .   | .          | 12                 |
| Huang, P.Y., <i>et al.</i> , 2021 <sup>28</sup>                                                 | 301            | 51.7             | 244  | B 240, C 661                      | ETV 301                                                   | 2.43                                          | 42.2                 | 34.6                     | 211 | 159 | 41         | 56.3               |
| Kuo, Y.H., <i>et al.</i> , 2021 <sup>29</sup>                                                   | 185            | 52.2             | 146  | B 139, C 46                       | TDF 185                                                   | 2.37                                          | 39.5                 | 31.7                     | 128 | 99  | 15         | 35.5               |
| Wübbolding, L.A., <i>et al.</i> , 2021 <sup>32</sup>                                            | 43             | 53               | 29   | –                                 | ETV 28, TDF 15                                            | 3.0                                           | >48                  | >12                      | 27  | .   | .          | 6                  |
| Papathodoridi, M., <i>et al.</i> , 2022 <sup>44</sup>                                           | 57             | 60               | 37   | Mainly D                          | ETV 18, TDF 39                                            | 2.8                                           | >96                  | 63.6                     | 42  | 19  | 14         | 38                 |
| <b>Combined HBeAg-positive and HBeAg-negative populations</b>                                   |                |                  |      |                                   |                                                           |                                               |                      |                          |     |     |            |                    |
| Hsu, Y.C., <i>et al.</i> , 2019 <sup>16</sup>                                                   | 135            | 49.5             | 109  | –                                 | ETV 113, TDF 22                                           | 2.77                                          | 36.7                 | 25.2                     | –   | 66  | 8          | 25.9               |
| Kaewdech, A., <i>et al.</i> , 2020 <sup>21</sup>                                                | 92             | 55               | 59   | –                                 | LMV 51, LMV+TDF 20,<br>ETV 13, LdT 9,<br>TDF 8, LMV+ADV 1 | 2.96                                          | 78                   | >12                      | –   | –   | 2          | 12                 |
| Lai, C.L., <i>et al.</i> , 2020 <sup>22</sup>                                                   | 13             | 56               | –    | –                                 | ETV 8, LdT 3, TDF 2                                       | 2.6                                           | 160.8                | >12                      | 12  | 3   | –          | 17.5               |
| Liu, Y., <i>et al.</i> , 2020 <sup>23</sup>                                                     | 30             | 46               | 21   | –                                 | ETV 17, LMV 8,<br>ADV 2, ADV+LMV 3                        | 1.91                                          | 57.5                 | >12                      | 11  | 7   | –          | 24                 |
| Seto, W.K., <i>et al.</i> , 2020 <sup>25</sup>                                                  | 114            | 58.4             | 75   | –                                 | ETV                                                       | 1.74                                          | 80.4                 | 63.6                     | 62  | 24  | 8          | 12                 |
| Tseng, T.N., <i>et al.</i> , 2020a <sup>26</sup>                                                | 135            | 52.6             | 104  | B 103, C 32                       | ETV 79, TDF 56                                            | 1.32                                          | 38.8                 | 31.3                     | 50  | 38  | 39         | 20.1               |
| Sonneveld, M.J., <i>et al.</i> , 2021 <sup>31</sup>                                             | 572            | 52               | 390  | –                                 | ETV 295, TDF 150                                          | <1.7: 14%<br>1.7–2: 8%<br>2–3: 33%<br>>3: 46% | 73.8                 | As per APASL<br>and EASL | 267 | 92  | 24         | 12                 |
| Xia, M., <i>et al.</i> , 2021 <sup>33</sup>                                                     | 135            | SR 35<br>CR 38   | 110  | –                                 | 1 <sup>st</sup> line 74, 2 <sup>nd</sup> line 61          | SR 2.3<br>CR 2.8                              | .                    | SR 30.0<br>CR 28.0       | –   | 50  | 13         | 31.2               |
| Kaewdech, A., <i>et al.</i> , 2022 <sup>43</sup>                                                | 92             | 55               | 59   | –                                 | LMV 51, LMV+TDF 20,<br>ETV 13, LdT 9,<br>TDF 8, LMV+ADV 1 | 2.96                                          | 78                   | >12                      | –   | –   | 7          | 35.5               |
| Sonneveld, M.J., <i>et al.</i> , 2022 <sup>45</sup>                                             | 1,216          | 50               | 880  | A 19, B 497, C<br>368, D 81, E 16 | ETV 717, TDF 372                                          | <1: 5.3%<br>1–2: 15.8%<br>>2: 78.9%           | 41.8                 | As per APASL<br>and EASL | –   | –   | 98         | 25.6               |

ADV, adefovir; ALT, alanine transaminase; APASL, Asian Pacific Association for the Study of the Liver; CR, clinical relapse; CT, consolidation time; eAg+, e-Antigen positive; eAg-, e-Antigen negative; ETV, entecavir; EOT, end of treatment; HBsAg, hepatitis B surface antigen (measured in log IU/ml); HBV DNA, hepatitis B virus deoxyribonucleic acid (measured in log copies/ml); LdT, telbivudine; LMV, lamivudine; SR, sustained response; TDF, tenofovir; TTT, total treatment time (measured in months); ULN, upper limit of normal; VR, viral relapse.

\* Fan, R., *et al.*, 2020A<sup>18</sup> and Fan, R. *et al.*, 2020B<sup>19</sup> use overlapping patient cohorts.

Table 4. Patient and treatment characteristics in studies exploring the role of immune markers in prediction of partial and functional cure.

| Paper                                                  | Total patients | Age (years)             | Male | Genotype                 | NA                                               | EOT HBsAg (log IU/ml)     | TTT (months)           | CT (months)            | VR | CR | HBsAg loss | Follow-up (months) |
|--------------------------------------------------------|----------------|-------------------------|------|--------------------------|--------------------------------------------------|---------------------------|------------------------|------------------------|----|----|------------|--------------------|
| Höner Zu Siederdisen, C., et al., 2016 <sup>13,*</sup> | 15             | 49.1                    | 12   | B 3, C 1, D 9            | .                                                | 3.1                       | >36                    | >36                    | 13 | .  | 3          | 12                 |
| Rinker, F., et al., 2018 <sup>35,*</sup>               |                |                         |      |                          | As above                                         |                           |                        |                        |    |    |            |                    |
| Zimmer, C.L., et al., 2018 <sup>36,*</sup>             |                |                         |      |                          | As above                                         |                           |                        |                        |    |    |            |                    |
| Rivino, L., et al., 2018 <sup>37</sup>                 |                |                         |      |                          |                                                  |                           |                        |                        |    |    |            |                    |
| Cohort 1                                               | 19             | 46                      |      | A 1, B 4, C 2, D 11, E 1 | TDF + LMV                                        | 3.6                       | >18                    | >18                    |    | 6  | —          | 6                  |
| Cohort 2                                               | 27             | 51.7                    |      | B 17, C 7                | ETV/TDF/LdT                                      | 3.1                       | >18                    | >18                    |    | 11 | —          | 8.8                |
| Su, T.H., et al., 2018 <sup>14</sup>                   | 100            | 51                      | 72   | B 74                     | ETV 66, TDF 34                                   | ETV 2.64<br>TDF 2.88      | 37                     | 26                     | 70 | 45 | —          | 35                 |
| Chi, H., et al., 2019 <sup>15</sup>                    | 100            | eAg+ 33<br>eAg- 41      | 86   | .                        | 1 <sup>st</sup> line 43, 2 <sup>nd</sup> line 57 | eAg+ 2.8<br>eAg- 2.5      | eAg+ 46.8<br>eAg- 57.6 | eAg+ 26.4<br>eAg- 34.8 | 76 | 39 | 6          | 30                 |
| Kranidioti, H., et al., 2019 <sup>38</sup>             | 23             | 59                      | 15   | .                        | .                                                | 3.4                       | 96                     | >36                    | .  | 13 | 4          | 55.2               |
| Wu, Y., et al., 2019 <sup>39</sup>                     | 106            | 36                      | 84   | .                        | .                                                | 3.2                       | >12                    | >12                    | .  | 36 | .          | 22.8               |
| Xie, L., et al., 2019 <sup>40</sup>                    | 91             | 36                      | 75   | .                        | .                                                | 2.9                       | >12                    | >12                    | 57 | 26 | .          | 12                 |
| García-López, M., et al., 2020 <sup>20</sup>           | 27             | 56                      | 21   | A 3, C 1, D 21, F 2      | TDF 20, ETV 7                                    | 2.6                       | 96                     | >36                    | 21 | 17 | 8          | 34                 |
| Papatheodoridi, M., et al., 2020 <sup>24</sup>         | 57             | 60                      | 37   | Mainly D                 | ETV 18, TDF 39                                   | 2.8                       | >48                    | 63.6                   | 42 | 19 | 14         | 19                 |
| Wübböling, L.A., et al., 2021 <sup>32</sup>            | 43             | 53                      | 29   | .                        | ETV 28, TDF 15                                   | 3.0                       | >48                    | >12                    | 27 | —  | —          | 6                  |
| Hall, S.A.L., et al., 2022 <sup>42</sup>               | 29             | No flare 54<br>Flare 60 | 17   | .                        | ETV 18, TDF 6                                    | No flare 2.7<br>Flare 3.1 | >24                    | >18                    | —  | 17 | 0          | 24                 |

ADV, adefovir; ALT, alanine transaminase; CR, clinical relapse; CT, consolidation time; eAg+, e-Antigen-positive; eAg-, e-Antigen-negative; ETV, entecavir; EOT, end of treatment; HBsAg, hepatitis B surface antigen (measured in log IU/ml); HBV DNA, hepatitis B virus deoxyribonucleic acid (measured in log copies/ml); LdT, telbivudine; SR, sustained response; TDF, tenofovir; TTT, total treatment time (measured in months); ULN, upper limit of normal; VR, viral relapse; .: data not specified.

\* Höner Zu Siederdisen, C., et al., 2016, Rinker, F., et al., 2018, and Zimmer, C.L., et al., 2018 use the same patient cohort.

1.6% in patients with EOT HBV RNA <3 vs. >3 log U/ml respectively ( $p = 0.007$ ).

Combining HBcrAg with qHBsAg

Hsu et al.<sup>16</sup> derived the SCALE-B score for CR, consisting of the five predictors: EOT HBsAg, EOT HBcrAg, age, ALT, and use of TDF. Stratifying patient risk, they demonstrated a significant difference in 3-yr CR rates of 86.2%, 55.6%, and 17.2% in the high-, intermediate-, and low-risk subgroups respectively ( $p = 0.0001$ ). Furthermore, all patients achieving functional cure were drawn from the low-risk subgroup and demonstrated EOT HBsAg levels <2 log IU/ml and EOT HBcrAg levels below 3 log U/ml. Later, Papatheodoridi et al.<sup>24</sup> also demonstrated a significant multivariate HR of 0.93 (0.87–0.98;  $p = 0.012$ ) per 1,000 points increase in the SCALE-B score for HBsAg seroclearance. Lower SCALE-B score was again associated with higher rates of partial and functional cure in Kaewdech et al.'s Thailand study<sup>43</sup> and the multicentre CREATE study.<sup>31</sup>

Combining HBV RNA with qHBsAg

Liu et al.<sup>23</sup> found that combining HBV RNA status and EOT HBsAg level was superior to EOT HBsAg level alone in predicting partial cure, with a 2-yr VR rate of 10% in patients with EOT HBsAg <2 log IU/ml and EOT HBV RNA negativity. Seto et al.<sup>25</sup> similarly demonstrated that a combination of undetectable EOT HBV RNA level and HBsAg <10 IU/ml was associated with a 1-yr VR rate of 9.1%. Lastly, Xie et al.<sup>34</sup> found that the combination of EOT HBsAg <100 IU/ml and EOT HBV RNA undetectability had the highest AUROC for VR or partial cure, with an AUROC of 0.698 that was superior to other singular and combined parameters.

Combining HBcrAg with HBV RNA

The cumulative rates of VR, CR, or functional cure stratified by a combination of EOT HBcrAg and EOT HBV RNA were reported in four studies (Fig. 2C). Xie et al.<sup>34</sup> demonstrated that combining EOT HBcrAg and EOT HBV RNA levels was able to strongly predict VR, whereas Fan et al.<sup>19</sup> and Kaewdech et al.<sup>21</sup> affirmed the same for both rates of CR and functional cure. Kaewdech et al.<sup>21</sup> demonstrated that the combination of EOT HBcrAg and EOT HBV RNA was most predictive of subsequent CR with an AUROC of 0.742 (0.64–0.84,  $p < 0.001$ ), indeed superior to qHBsAg alone with an AUROC of 0.609 (0.49–0.73,  $p = 0.089$ ). In the study by Papatheodoridi et al.,<sup>44</sup> although more patients who did not develop VR/CR or achieved HBsAg seroclearance had undetectable HBcrAg and HBV RNA, a combination of detectable HBV RNA and/or HBcrAg at EOT was not significantly associated with partial or functional cure.

Novel immune markers

Non-disease-specific immune markers

Single nucleotide polymorphisms in various genes<sup>14,39</sup> have been explored in the context of HBV treatment discontinuation, but the specificity and clinical significance of these findings remain uncertain. For example, Wu et al.<sup>39</sup> found that the rs676925 'GC' genotype of the CXCR5 gene was associated with decreased risk of CR, but failed to demonstrate a corresponding difference in percentage of CXCR5-positivity or expression of CXCL13 ligand between genotype groups. With respect to whole genome gene expression analysis, Kranidioti et al.<sup>38</sup> found that lower gene expression of CCL20, CCL4, CXCL2, CXCL3, interferon-gamma (IFN $\gamma$ ), IL-8, IL-1A, IL-1B, FASLG and TNFRSF9 in peripheral



**Table 5. Summary of novel viral markers.**

| Paper                                                                                                                                                                           | Relation with VR                                                                                                                                                                                                                                                                                                          | Relation with CR                                                                                                                                                                                                                                                                                                                                                                                                                                                                                                                                                                                                                                                                                                       | Relation with HBsAg clearance                                                                                                                                                                                                                     |
|---------------------------------------------------------------------------------------------------------------------------------------------------------------------------------|---------------------------------------------------------------------------------------------------------------------------------------------------------------------------------------------------------------------------------------------------------------------------------------------------------------------------|------------------------------------------------------------------------------------------------------------------------------------------------------------------------------------------------------------------------------------------------------------------------------------------------------------------------------------------------------------------------------------------------------------------------------------------------------------------------------------------------------------------------------------------------------------------------------------------------------------------------------------------------------------------------------------------------------------------------|---------------------------------------------------------------------------------------------------------------------------------------------------------------------------------------------------------------------------------------------------|
| <b>HBeAg positive populations</b>                                                                                                                                               |                                                                                                                                                                                                                                                                                                                           |                                                                                                                                                                                                                                                                                                                                                                                                                                                                                                                                                                                                                                                                                                                        |                                                                                                                                                                                                                                                   |
| Fan, R., <i>et al.</i> , 2020A <sup>18</sup><br>EOT HBV RNA: 26% undetected<br>EOT HBV DNA: 48.5% undetected; 43.8% <20 IU/ml†<br>EOT HBV RNA and EOT HBV DNA: 19.7% undetected | <b>EOT HBV RNA</b><br>AUROC 0.775<br><br><b>EOT HBV DNA and EOT HBV RNA:</b><br>Cumulative incidence of 4-yr CR: no <i>p</i> value*<br>DNA negative and RNA <3 log U/ml: 8%<br>DNA positive or RNA >3 log U/ml: 37%<br>MV HR (DNA + or RNA >3 log U/ml vs. DNA - and RNA <3 log U/ml): 11.10 (2.69-45.80) <i>p</i> = 0.00 | <b>EOT HBV RNA</b><br>Cumulative incidence of 4-yr CR: <i>p</i> = 0.03*<br>RNA <3 log U/ml: 15.3%<br>RNA >3 log U/ml: 37.0%<br>AUROC 0.732<br><b>EOT HBV DNA and EOT HBV RNA</b><br>Cumulative incidence of 4-yr CR: <i>p</i> = 0.02*<br>DNA negative and RNA <3 log U/ml: 8% (NPV 92%)<br>DNA positive or RNA >3 log U/ml: 31.4%<br>MV HR (DNA + or RNA >3 log U/ml vs. DNA - and RNA <3 log U/ml): 4.54 (1.08-19.00) <i>p</i> = 0.04                                                                                                                                                                                                                                                                                 | N/A                                                                                                                                                                                                                                               |
| Fan, R., <i>et al.</i> , 2020B <sup>19</sup><br>EOT HBcrAg: 4.3 log U/ml<br>EOT HBV RNA: 3 log copies/ml, 31.5% undetected                                                      | N/A                                                                                                                                                                                                                                                                                                                       | <b>EOT HBcrAg</b><br>Cumulative incidence of 4-yr CR: <i>p</i> = 0.00*<br>HBcrAg <4 log U/ml: 7.3%<br>HBcrAg >4 log U/ml: 39.5%<br>MV HR (>4 vs. <4 log U/ml): 5.70 (1.37-23.67) <i>p</i> = 0.02<br>AUROC 0.621<br><b>EOT HBV RNA*</b><br>Cumulative incidence of 4-yr CR: <i>p</i> = 0.00<br>RNA <3 log U/ml: 12.9%<br>RNA >3 log U/ml: 40.1%<br>MV HR (>3 vs. <3 log U/ml): 3.58 (1.26-10.14) <i>p</i> = 0.02<br>AUROC 0.635<br><b>EOT HBcrAg and EOT HBV RNA*</b><br>Cumulative incidence of 4-yr CR: <i>p</i> = 0.00<br>RNA <3 log U/ml and HBcrAg <4 log U/ml: 0%<br>RNA >3 log U/ml or HBcrAg >4 log U/ml: 17.3%<br>RNA >3 log U/ml and HBcrAg >4 log U/ml: 46.8%<br>AUROC 0.696                                 | <b>EOT HBcrAg and EOT HBV RNA*</b><br><i>In combination with the validation cohort:</i><br>Cumulative incidence of 4-yr clearance: <i>p</i> = 0.00<br>RNA <3 log U/ml and HBcrAg <4 log U/ml: 16.1%<br>RNA >3 log U/ml or HBcrAg >4 log U/ml 1.3% |
| Liao, G., <i>et al.</i> , 2021 <sup>30</sup><br>EOT HBcrAg: 3.8 log U/ml                                                                                                        | <b>EOT HBcrAg</b><br>MV HR (>4 vs. <4 log U/ml): 1.725 (1.063-2.800) <i>p</i> <0.027                                                                                                                                                                                                                                      | <b>EOT HBcrAg</b><br>Cumulative incidence of 5-yr CR: <i>p</i> <0.001*<br>HBcrAg < 4 log U/ml: 23.2%<br>HBcrAg > 4 log U/ml: 65.8%<br>MV HR (>4 vs. <4 log U/ml): 2.105 (1.440-3.077) <i>p</i> <0.001<br>AUROC 0.78 at 1 yr, 0.71 at 3 yr, 0.71 at 5 yr<br>Sensitivity 87.1%, specificity 61.5%, PPV 50%, NPV 92.2%<br><b>EOT HBsAg and EOT HBcrAg</b><br>Cumulative incidence of 5-yr CR: <i>p</i> <0.001<br>HBsAg >2 log IU/ml and HBcrAg <4 log U/ml: 29.4%<br>HBsAg >2 log IU/ml and HBcrAg >4 log U/ml: 78.1%<br><b>SCALE-B Score Evaluation</b><br>Cumulative incidence of 5-yr CR: <i>p</i> <0.001<br>Low risk: 22.2%<br>Medium risk: 50%<br>High risk: 82.2%<br>AUROC 0.81 at 1 yr, 0.74 at 3 yr, 0.75 at 5 yr | <b>EOT HBcrAg</b><br><i>Only four of 12 patients achieving HBsAg loss had undetectable HBcrAg</i>                                                                                                                                                 |

(continued on next page)

**Table 5** (continued)

| Paper                                                                                                              | Relation with VR                                                                                                                                                                                                                                                                                                                                                                                                                                                                                                                                                                                                                                                                                                                                                                                                                                                                                                                                                                                                                                                                                                                                                                                                                                                                                                                                                                                   | Relation with CR                                                                                                                                                                              | Relation with HBsAg clearance                                                                                                                                                                                                                                                                                    |
|--------------------------------------------------------------------------------------------------------------------|----------------------------------------------------------------------------------------------------------------------------------------------------------------------------------------------------------------------------------------------------------------------------------------------------------------------------------------------------------------------------------------------------------------------------------------------------------------------------------------------------------------------------------------------------------------------------------------------------------------------------------------------------------------------------------------------------------------------------------------------------------------------------------------------------------------------------------------------------------------------------------------------------------------------------------------------------------------------------------------------------------------------------------------------------------------------------------------------------------------------------------------------------------------------------------------------------------------------------------------------------------------------------------------------------------------------------------------------------------------------------------------------------|-----------------------------------------------------------------------------------------------------------------------------------------------------------------------------------------------|------------------------------------------------------------------------------------------------------------------------------------------------------------------------------------------------------------------------------------------------------------------------------------------------------------------|
| Xie, Y., et al., 2021 <sup>34</sup><br>EOT HBcrAg: 3.8 log U/ml<br>EOT HBV RNA: 0 log copies/ml,<br>71% undetected | <p><b>EOT HBV RNA</b><br/>Cumulative incidence of 2-yr VR: <math>p &lt; 0.001^*</math><br/>RNA negative: 39.4%<br/>RNA positive: 77.5%<br/>MV OR (RNA - vs. +): 3.453 (1.387–8.597) <math>p = 0.008</math><br/>AUROC 0.656</p> <p><b>EOT HBcrAg</b><br/>Cumulative incidence of 2-yr VR: <math>p &lt; 0.001^*</math><br/>HBcrAg &lt;4 log U/ml: 36.3%<br/>HBcrAg &gt;4 log U/ml: 74.5%<br/>MV OR (&gt;4 vs. &lt;4 log U/ml): 3.702 (1.614–8.488) <math>p = 0.002</math><br/>AUROC 0.616</p> <p><b>EOT HBsAg and EOT HBcrAg</b><br/>Cumulative incidence of 2-yr VR: <math>p &lt; 0.001</math><br/>HBsAg &lt;2 log IU/ml and HBcrAg &lt;4 log U/ml: 10.5%<br/>HBsAg &gt;2 log IU/ml and/or HBcrAg &gt;4 log U/ml: 56.7%<br/>AUROC 0.609</p> <p><b>EOT HBsAg and EOT HBV RNA</b><br/>Cumulative incidence of 2-yr VR: <math>p &lt; 0.001</math><br/>HBsAg &lt;2 log IU/ml and HBV RNA negative: 5%<br/>HBsAg &gt;2 log IU/ml and/or HBV RNA positive: 58%<br/>AUROC 0.698</p> <p><b>EOT HBcrAg and EOT HBV RNA*</b><br/>Cumulative incidence of 2-yr VR: <math>p &lt; 0.001</math><br/>HBcrAg &lt;4 log U/ml and HBV RNA-negative: 31%<br/>HBcrAg &gt;4 log U/ml and/or HBV RNA-positive: 70.6%<br/>AUROC 0.631</p> <p><b>EOT HBsAg, HBcrAg, and HBV RNA</b><br/>Cumulative incidence of 2-yr VR:<br/>HBsAg &lt;2 log IU/ml and HBcrAg &lt;4 log U/ml and HBV RNA-negative: 5.6%<br/>AUROC 0.616</p> | <p><b>EOT HBV RNA</b><br/>MV OR (RNA - vs. +): 4.782 (1.968–11.621) <math>p = 0.001</math></p>                                                                                                |                                                                                                                                                                                                                                                                                                                  |
| Chen, C.H., et al., 2022 <sup>41</sup><br>EOT HBcrAg: 4.4–4.5 log U/ml                                             | <p><b>Baseline HBcrAg</b><br/>UV HR (per log U/ml): 1.11 (0.92–1.33) <math>p = 0.265</math></p> <p><b>EOT HBcrAg</b><br/>MV HR (per log U/ml): 1.54 (1.22–1.96) <math>p &lt; 0.001</math></p>                                                                                                                                                                                                                                                                                                                                                                                                                                                                                                                                                                                                                                                                                                                                                                                                                                                                                                                                                                                                                                                                                                                                                                                                      | <p><b>Baseline HBcrAg</b><br/>UV HR (per log U/ml): 1.15 (0.92–1.43) <math>p = 0.220</math></p> <p><b>EOT HBcrAg</b><br/>MV HR (per log U/ml): 1.63 (1.27–2.09) <math>p &lt; 0.001</math></p> |                                                                                                                                                                                                                                                                                                                  |
| <b>HBsAg-negative populations</b>                                                                                  |                                                                                                                                                                                                                                                                                                                                                                                                                                                                                                                                                                                                                                                                                                                                                                                                                                                                                                                                                                                                                                                                                                                                                                                                                                                                                                                                                                                                    |                                                                                                                                                                                               |                                                                                                                                                                                                                                                                                                                  |
| Höner Zu Siederdisen, C., et al., 2016 <sup>13</sup>                                                               | N/A                                                                                                                                                                                                                                                                                                                                                                                                                                                                                                                                                                                                                                                                                                                                                                                                                                                                                                                                                                                                                                                                                                                                                                                                                                                                                                                                                                                                | N/A                                                                                                                                                                                           | <p><b>EOT HBcrAg and EOT HBsAg</b><br/>The three out of 15 patients with HBsAg loss demonstrated a &gt;1 log HBsAg reduction over median 33-month (12–50 months) follow-up and had a strong increase in HBV DNA (<math>&gt;4 \times 10^5</math> IU/ml) and &gt;90-fold increase in HBcrAg at 4–8 wk post-EOT</p> |

(continued on next page)

Table 5 (continued)

| Paper                                                                                                                                  | Relation with VR                                                                                                                                                                                                                                                                                                                                                                                                                                                                                                                                                                                                                                                                              | Relation with CR                                                                                                                                                                                                                                                                                                                                                                                                                                                                                                                                                                                                                         | Relation with HBsAg clearance                                                                                                                                                                                                                         |
|----------------------------------------------------------------------------------------------------------------------------------------|-----------------------------------------------------------------------------------------------------------------------------------------------------------------------------------------------------------------------------------------------------------------------------------------------------------------------------------------------------------------------------------------------------------------------------------------------------------------------------------------------------------------------------------------------------------------------------------------------------------------------------------------------------------------------------------------------|------------------------------------------------------------------------------------------------------------------------------------------------------------------------------------------------------------------------------------------------------------------------------------------------------------------------------------------------------------------------------------------------------------------------------------------------------------------------------------------------------------------------------------------------------------------------------------------------------------------------------------------|-------------------------------------------------------------------------------------------------------------------------------------------------------------------------------------------------------------------------------------------------------|
| Carey, I., et al., 2020 <sup>17,*</sup><br>EOT HBcrAg: 2.0 log U/ml, 83% undetected<br>EOT pgRNA: 0 log U/ml, 87% undetected           |                                                                                                                                                                                                                                                                                                                                                                                                                                                                                                                                                                                                                                                                                               | <b>EOT HBsAg</b><br>No significant change after NA withdrawal<br>Steeper HBsAg decline correlated with lower baseline HBsAg, HBcrAg, RNA, and EOT HBsAg levels<br><b>EOT HBcrAg and EOT HBV pgRNA</b><br>Transient resolving elevations after NA cessation<br>CR occurred only in the four patients with HBcrAg >3 log U/ml (100% sensitivity, specificity and PPV)<br>Three of these patients had RNA >1.65 log U/ml (75% sensitivity, 100% specificity, 100% PPV)                                                                                                                                                                      |                                                                                                                                                                                                                                                       |
| García-López, et al., 2020 <sup>20</sup><br>EOT HBcrAg: 3.2 log U/ml, 52% undetected<br>EOT HBV RNA: 2.1 log copies/ml, 59% undetected |                                                                                                                                                                                                                                                                                                                                                                                                                                                                                                                                                                                                                                                                                               |                                                                                                                                                                                                                                                                                                                                                                                                                                                                                                                                                                                                                                          | <b>EOT HBcrAg and HBV-RNA</b><br>More frequently undetectable in patients who achieved HBsAg loss than in patients who did not HBcrAg: 75% vs. 42%; $p = 0.12$<br>HBV-RNA: 88% vs. 47%; $p = 0.053$                                                   |
| Papatheodoridi, M., et al., 2020 <sup>24</sup><br>EOT HBcrAg: <2 log U/ml, 62% undetected                                              | <b>EOT HBcrAg</b><br>HR: Not significantly associated with VR                                                                                                                                                                                                                                                                                                                                                                                                                                                                                                                                                                                                                                 | <b>EOT HBcrAg</b><br>Cumulative incidence of 2-yr retreatment: $p = 0.03^*$<br>HBcrAg >2 log U/ml: 45%<br>HBcrAg <2 log U/ml: 17%<br>MV HR per log U/ml: 1.86 (1.11-3.11) $p = 0.02$<br>MV HR (>2 vs. <2 log U/ml): 3.64 (1.23-10.75) $p = 0.02$                                                                                                                                                                                                                                                                                                                                                                                         | <b>EOT HBcrAg</b><br>HR: Not significantly associated with clearance                                                                                                                                                                                  |
| Cheng, H.R., et al., 2021 <sup>27</sup><br>EOT HBcrAg: 3.6 log U/ml                                                                    | <b>EOT HBcrAg</b><br>Cumulative incidence of 1-yr VR: $p < 0.001^*$<br>HBcrAg <3.3 log U/ml: 60.0%<br>HBcrAg >3.3 log U/ml: 94.7%<br>HR (>3.3 vs. <3.3 log U/ml): 3.31 (1.72-6.38) $p < 0.001$<br>AUROC 7.017                                                                                                                                                                                                                                                                                                                                                                                                                                                                                 |                                                                                                                                                                                                                                                                                                                                                                                                                                                                                                                                                                                                                                          |                                                                                                                                                                                                                                                       |
| Huang, P.Y., et al., 2021 <sup>28</sup><br>Baseline HBcrAg: 4.9 log U/ml<br>EOT HBcrAg: 3.4 log U/ml                                   | <b>Baseline HBcrAg</b><br>Cumulative incidence of 5-yr VR: $p < 0.001^*$<br>HBcrAg <4 log U/ml: 56.5%<br>HBcrAg >4 log U/ml: 79%<br>UV HR (per log U/ml): 1.086 (1.008-1.171) $p = 0.031$<br>Not significantly associated in MV analysis<br><b>EOT HBsAg and baseline HBcrAg</b><br>Cumulative incidence of 5-yr VR: $p = 0.006$<br>HBsAg <150 IU/ml and HBcrAg <4 log U/ml: 27.9%<br>HBsAg <150 IU/ml and HBcrAg >4 log U/ml: 59.1%<br>HBsAg >150 IU/ml and HBcrAg <4 log U/ml: 75.9%<br>HBsAg >150 IU/ml and HBcrAg >4 log U/ml: 84.2%<br>MV HR (HBsAg <150 IU/ml and HBcrAg <4 log U/ml): 0.370 (0.187-0.730) $p = 0.004$<br><b>EOT HBcrAg</b><br>HR: not significantly associated with VR | <b>Baseline HBcrAg</b><br>Cumulative incidence of 5-yr CR: $p = 0.001^*$<br>HBcrAg <4 log U/ml: 41.8%<br>HBcrAg >4 log U/ml: 65%<br>Not significantly associated in UV or MV analysis<br><b>EOT HBsAg and baseline HBcrAg</b><br>Cumulative incidence of 5-yr CR: $p = 0.014$<br>HBsAg <150 IU/ml and HBcrAg <4 log U/ml: 18%<br>HBsAg <150 IU/ml and HBcrAg >4 log U/ml: 48.1%<br>HBsAg >150 IU/ml and HBcrAg <4 log U/ml: 58.8%<br>HBsAg >150 IU/ml and HBcrAg >4 log U/ml: 69.1%<br>MV HR (HBsAg <150 IU/ml and HBcrAg <4 log U/ml): 0.356 (0.156-0.811) $p = 0.014$<br><b>EOT HBcrAg</b><br>HR: not significantly associated with CR | <b>Baseline HBcrAg</b><br>Cumulative incidence of 5-yr clearance: $p = 0.002^*$<br>HBcrAg <3.7 log U/ml: 29.4%<br>HBcrAg >3.7 log U/ml: 13.5%<br>UV HR (per log U/ml): 0.815 (0.692-0.961) $p = 0.015$<br>Not significantly associated in MV analysis |

(continued on next page)

**Table 5** (continued)

| Paper                                                                                                                                                                                            | Relation with VR                                                                                                                                                                                                                                                                                                                                                                                                                                                                                                                                                                                                                                                                                                                                                                                                                                                                                                                                                                                                                                                                                                                                                                                                     | Relation with CR                                                                                                                                                                                                                                                                                                                                                                                                                                                                                                                                                                                                                                                                                                                                                                                                                                                                                                                                                                                                                                                                                                                                                                      | Relation with HBsAg clearance                                                                                                                                                                                                                                                                                                                                                                                                                                                                                                                                                                                                          |
|--------------------------------------------------------------------------------------------------------------------------------------------------------------------------------------------------|----------------------------------------------------------------------------------------------------------------------------------------------------------------------------------------------------------------------------------------------------------------------------------------------------------------------------------------------------------------------------------------------------------------------------------------------------------------------------------------------------------------------------------------------------------------------------------------------------------------------------------------------------------------------------------------------------------------------------------------------------------------------------------------------------------------------------------------------------------------------------------------------------------------------------------------------------------------------------------------------------------------------------------------------------------------------------------------------------------------------------------------------------------------------------------------------------------------------|---------------------------------------------------------------------------------------------------------------------------------------------------------------------------------------------------------------------------------------------------------------------------------------------------------------------------------------------------------------------------------------------------------------------------------------------------------------------------------------------------------------------------------------------------------------------------------------------------------------------------------------------------------------------------------------------------------------------------------------------------------------------------------------------------------------------------------------------------------------------------------------------------------------------------------------------------------------------------------------------------------------------------------------------------------------------------------------------------------------------------------------------------------------------------------------|----------------------------------------------------------------------------------------------------------------------------------------------------------------------------------------------------------------------------------------------------------------------------------------------------------------------------------------------------------------------------------------------------------------------------------------------------------------------------------------------------------------------------------------------------------------------------------------------------------------------------------------|
| Kuo, Y.H., <i>et al.</i> , 2021 <sup>29</sup><br>Baseline HBcrAg: 5.3 log U/ml<br>EOT HBcrAg: 3.3 log U/ml                                                                                       | <p><b>Baseline HBcrAg</b><br/>Cumulative incidence of 3-yr VR: <math>p &lt; 0.001^*</math><br/>HBcrAg &lt;4.7 log U/ml: 55.1%<br/>HBcrAg &gt;4.7 log U/ml: 82.4%<br/>UV HR (per log U/ml): 1.201 (1.078–1.338) <math>p = 0.001</math><br/>Not significantly associated in MV analysis<br/>AUROC 0.688</p> <p><b>EOT HBcrAg</b><br/>Cumulative incidence of 3-yr VR: <math>p = 0.001^*</math><br/>HBcrAg &lt;3 log U/ml: 61.4%<br/>HBcrAg &gt;3 log U/ml: 84.2%<br/>UV HR (per log U/ml): 1.489 (1.133–1.955) <math>p = 0.004</math><br/>Not significantly associated in MV analysis<br/>AUROC 0.640</p> <p><b>EOT HBsAg and baseline HBcrAg</b><br/>Cumulative incidence of 3-yr VR: <math>p = 0.003</math>, <math>p = 0.470</math><br/>HBsAg &lt;2 log IU/ml and HBcrAg &lt;4.7 log U/ml: 20.3%<br/>HBsAg &lt;2 log IU/ml and HBcrAg &gt;4.7 log U/ml: 60.4%<br/>HBsAg &gt;2 log IU/ml and HBcrAg &lt;4.7 log U/ml: 80.6%<br/>HBsAg &gt;2 log IU/ml and HBcrAg &gt;4.7 log U/ml: 87.3%</p> <p><b>EOT HBsAg and EOT HBcrAg</b><br/>Cumulative incidence of 3-yr VR: <math>p = 0.149</math><br/>HBsAg &lt;2 log IU/ml and HBcrAg &lt;3 log U/ml: 30.4%<br/>HBsAg &lt;2 log IU/ml and HBcrAg &gt;3 log U/ml: 51.8%</p> | <p><b>Baseline HBcrAg</b><br/>Cumulative incidence of 3-yr CR: <math>p &lt; 0.001^*</math><br/>HBcrAg &lt;4.7 log U/ml: 39.4%<br/>HBcrAg &gt;4.7 log U/ml: 72.6%<br/>UV HR (per log U/ml): 1.227 (1.083–1.391) <math>p = 0.001</math><br/>Not significantly associated in MV analysis</p> <p><b>EOT HBcrAg</b><br/>Cumulative incidence of 3-yr CR: <math>p = 0.008^*</math><br/>HBcrAg &lt;3 log U/ml: 48%<br/>HBcrAg &gt;3 log U/ml: 73.3%<br/>UV HR (per log U/ml): 1.569 (1.157–2.127) <math>p = 0.004</math><br/>Not significantly associated in MV analysis</p> <p><b>EOT HBsAg and baseline HBcrAg</b><br/>Cumulative incidence of 3-yr CR: <math>p &lt; 0.001</math>, <math>p = 0.322</math><br/>HBsAg &lt;2 log IU/ml and HBcrAg &lt;4.7 log U/ml: 10.3%<br/>HBsAg &lt;2 log IU/ml and HBcrAg &gt;4.7 log U/ml: 59.5%<br/>HBsAg &gt;2 log IU/ml and HBcrAg &lt;4.7 log U/ml: 62.1%<br/>HBsAg &gt;2 log IU/ml and HBcrAg &gt;4.7 log U/ml: 75.4%</p> <p><b>EOT HBsAg and EOT HBcrAg</b><br/>Cumulative incidence of 3-yr CR: <math>p = 0.142</math><br/>HBsAg &lt;2 log IU/ml and HBcrAg &lt;3 log U/ml: 22.2%<br/>HBsAg &lt;2 log IU/ml and HBcrAg &gt;3 log U/ml: 46.4%</p> | <p><b>Baseline HBcrAg</b><br/>Cumulative incidence of 3-yr clearance: <math>p &lt; 0.001^*</math><br/>HBcrAg &lt;3 log U/ml: 42.9%<br/>HBcrAg &gt;3 log U/ml: 7.9%<br/>AUROC 0.688</p>                                                                                                                                                                                                                                                                                                                                                                                                                                                 |
| Wübböding, L. A., <i>et al.</i> , 2021 <sup>32</sup><br>EOT HBcrAg: 3.0 log U/ml<br>Papatheodoridi, M., <i>et al.</i> , 2022 <sup>44</sup><br>EOT HBcrAg: <2 log U/ml<br>EOT RNA: 93% undetected | <p><b>HBcrAg</b><br/>AUROC 0.56</p> <p><b>EOT HBV RNA</b><br/>Cumulative incidence of 12-month VR: <math>p = 0.306^*</math><br/>RNA negative: 68%<br/>RNA positive: 100%<br/>HR (positive vs. negative): 3.20 (1.10–9.32) <math>p = 0.033</math></p> <p><b>EOT HBcrAg and EOT HBV RNA*</b><br/>HBcrAg &gt;2 log U/ml and RNA positive: <math>p = 0.042</math><br/>47% of patients with VR and 18% of patients without VR<br/>HR (either positive vs. both negative): not significant</p> <p><b>EOT HBsAg, EOT HBcrAg and EOT HBV RNA</b><br/>HBsAg &gt; 3 log IU/ml and HBcrAg &gt;2 log U/ml and RNA positive: <math>p = 0.209</math><br/>58% of patients with VR and 35% of patients without VR<br/>HR (any positive vs. both negative): not significant</p>                                                                                                                                                                                                                                                                                                                                                                                                                                                       | <p><b>EOT HBV RNA</b><br/>Cumulative incidence of 12-month CR: <math>p = 0.01^*</math><br/>RNA negative: 28%<br/>RNA positive: 100%<br/>HR (positive vs. negative): 4.73 (1.51–14.86) <math>p = 0.008</math></p> <p><b>EOT HBcrAg and EOT HBV RNA*</b><br/>HBcrAg &gt;2 log U/ml and RNA positive: <math>p = 0.07</math><br/>59% of patients with CR and 29% of patients without CR<br/>HR (either positive vs. both negative): not significant</p> <p><b>EOT HBsAg, EOT HBcrAg, and EOT HBV RNA</b><br/>HBsAg &gt; 3 log IU/ml and HBcrAg &gt;2 log U/ml and RNA positive: <math>p = 0.097</math><br/>71% of patients with CR and 42% of patients without CR<br/>HR (any positive vs. both negative): not significant</p>                                                                                                                                                                                                                                                                                                                                                                                                                                                            | <p><b>EOT HBV RNA</b><br/>HR (positive vs. negative): not significantly associated with clearance</p> <p><b>EOT HBcrAg and EOT HBV RNA*</b><br/>HBcrAg &gt;2 log U/ml and RNA positive: <math>p = 0.009</math><br/>0% of patients with HBsAg loss and 46% of patients without HBsAg loss<br/>HR (either positive vs. both negative): not significant</p> <p><b>EOT HBsAg, EOT HBcrAg, and EOT HBV RNA</b><br/>HBsAg &gt;3 log IU/ml and HBcrAg &gt;2 log U/ml, and RNA positive: <math>p = 0.003</math><br/>0% of patients with HBsAg loss and 61% of patients without VR<br/>HR (any positive vs. both negative): not significant</p> |
| <b>Combined HBeAg-positive and HBeAg-negative populations</b>                                                                                                                                    |                                                                                                                                                                                                                                                                                                                                                                                                                                                                                                                                                                                                                                                                                                                                                                                                                                                                                                                                                                                                                                                                                                                                                                                                                      |                                                                                                                                                                                                                                                                                                                                                                                                                                                                                                                                                                                                                                                                                                                                                                                                                                                                                                                                                                                                                                                                                                                                                                                       |                                                                                                                                                                                                                                                                                                                                                                                                                                                                                                                                                                                                                                        |
| Hsu, Y.C., <i>et al.</i> , 2019 <sup>16</sup><br>EOT HBcrAg: 3.0 log U/ml                                                                                                                        | N/A                                                                                                                                                                                                                                                                                                                                                                                                                                                                                                                                                                                                                                                                                                                                                                                                                                                                                                                                                                                                                                                                                                                                                                                                                  | <p><b>EOT HBcrAg</b><br/>MV HR per log U/ml: 1.48 (1.20-1.83) <math>p = 0.00</math><br/>AUROC 0.61-0.75</p>                                                                                                                                                                                                                                                                                                                                                                                                                                                                                                                                                                                                                                                                                                                                                                                                                                                                                                                                                                                                                                                                           | <p><b>EOT HBcrAg</b><br/>UV HR per log IU/ml: 0.44 (0.23-0.86)<br/><math>p = 0.02</math></p>                                                                                                                                                                                                                                                                                                                                                                                                                                                                                                                                           |

(continued on next page)

Table 5 (continued)

| Paper                                                                                                                                                                                                                                | Relation with VR                                                                                                                                                                                                                                                                                                                                                                                                                                                                | Relation with CR                                                                                                                                                                                                                                                                                                                                                                                                                                                                                                                                                                                                                                                                                                           | Relation with HBsAg clearance                                                                                                                                                                                                                                  |
|--------------------------------------------------------------------------------------------------------------------------------------------------------------------------------------------------------------------------------------|---------------------------------------------------------------------------------------------------------------------------------------------------------------------------------------------------------------------------------------------------------------------------------------------------------------------------------------------------------------------------------------------------------------------------------------------------------------------------------|----------------------------------------------------------------------------------------------------------------------------------------------------------------------------------------------------------------------------------------------------------------------------------------------------------------------------------------------------------------------------------------------------------------------------------------------------------------------------------------------------------------------------------------------------------------------------------------------------------------------------------------------------------------------------------------------------------------------------|----------------------------------------------------------------------------------------------------------------------------------------------------------------------------------------------------------------------------------------------------------------|
| Kaewdech, A., et al., 2020 <sup>21</sup><br>EOT HBcrAg: 3.2 log U/ml, 63% undetected (4.0 in HBeAg positive, 3.0 in HBeAg negative)<br>EOT HBV RNA: 2.0 log copies/ml, 49% undetected (2.0 in HBeAg positive, 2.2 in HBeAg negative) | <b>EOT HBcrAg</b><br>Cumulative incidence of 48-wk VR: $p = 0.01^*$<br>HBcrAg <3 log U/ml: 44.1%<br>HBcrAg >3 log U/ml: 74.1%<br>AUROC 0.686<br><br><b>EOT HBV RNA</b><br>Cumulative incidence of 48-wk VR: $p = 0.05^*$<br>HBV RNA <2 log U/ml: 50%<br>HBV RNA >2 log U/ml: 72%<br>AUROC 0.648<br><br><b>EOT HBcrAg and EOT HBV RNA</b><br>AUROC 0.742<br><br><b>EOT HBsAg, EOT HBcrAg, and EOT HBV RNA</b><br>AUROC 0.746                                                     | <b>EOT HBcrAg</b><br>Cumulative incidence of 48-wk CR: $p = 0.00^*$<br>HBcrAg <3 log U/ml: 8.8%<br>HBcrAg >3 log U/ml: 48.3%<br>MV HR per log U/ml: 2.21 (1.50–3.24) $p = 0.00$<br>AUROC 0.773<br><br><b>EOT HBV RNA</b><br>Cumulative incidence of 48-wk CR: $p = 0.04^*$<br>RNA <2 log U/ml: 21.1%<br>RNA >2 log U/ml: 42.6%<br>MV HR per log U/ml: 1.32 (1.02–1.70) $p = 0.03$<br>AUROC: 0.657<br><br><b>EOT HBcrAg and EOT HBV RNA</b><br>Cumulative incidence of 48-wk CR: $p = 0.00^*$<br>RNA <2 log U/ml and HBcrAg <3 log U/ml: 0%<br>RNA >2 log U/ml or HBcrAg >3 log U/ml: 22.9%<br>RNA >2 log U/ml and HBcrAg >3 log U/ml: 62.5%<br>AUROC 0.816<br><b>EOT HBsAg, EOT HBcrAg, and EOT HBV RNA</b><br>AUROC 0.807 | <b>EOT HBcrAg</b><br>Cumulative incidence of 48-wk clearance: $p = 0.06^*$<br>HBcrAg <3 log U/ml: 5.9%<br>HBcrAg >3 log U/ml: 0%<br><b>EOT HBV RNA</b><br>Cumulative incidence of 48-wk clearance: $p = 0.5^*$<br>RNA <2 log U/ml: 3.7%<br>RNA >2 log U/ml: 0% |
| Lai, C.L., et al., 2020 <sup>22</sup><br>EOT HBcrAg: 3.4 log U/ml, 31% undetected<br>EOT HBV RNA: 100% undetected                                                                                                                    | <b>EOT HBcrAg</b><br>Median HBcrAg at VR: 3.76 log U/ml<br><i>Significantly higher than at EOT (<math>p = 0.005</math>)</i><br><b>EOT HBV RNA</b><br><i>RNA remained undetected in all but one patient after VR</i>                                                                                                                                                                                                                                                             | EOT HBV RNA<br>Cumulative incidence of 2-yr CR: $p = 0.04^*$<br>RNA negative: 17.50%<br>RNA positive: 38.27%<br>UV HR (negative vs. positive): 0.17 (0.03–1.09) $p = 0.06$<br>EOT HBsAg and EOT HBV RNA<br>MV HR (RNA negative and HBsAg <3 log IU/ml): 0.101 (0.012–0.884) $p = 0.04$                                                                                                                                                                                                                                                                                                                                                                                                                                     |                                                                                                                                                                                                                                                                |
| Liu, Y., et al., 2020 <sup>23</sup><br>EOT HBV RNA: 55% undetected (59% in HBeAg positive, 46% in HBeAg negative)                                                                                                                    | EOT HBV RNA<br>UV HR (negative vs. positive): 0.37 (0.10–1.37) $p = 0.14$<br>Not significant<br><br>EOT HBsAg and EOT HBV RNA<br>Cumulative incidence of 2-yr VR: no $p$ value<br>HBsAg <2 log IU/ml and RNA negative 10%<br>HBsAg <3 log IU/ml and RNA negative 23%<br>MV HR (HBsAg <3 log IU/ml and RNA negative): 0.20 (0.05–0.91) $p = 0.037$                                                                                                                               |                                                                                                                                                                                                                                                                                                                                                                                                                                                                                                                                                                                                                                                                                                                            |                                                                                                                                                                                                                                                                |
| Seto, W.K., et al., 2020 <sup>25</sup><br>EOT HBcrAg: 3 log U/ml, 19% undetected<br>EOT HBV RNA: 1.65 log U/ml, 36% undetected                                                                                                       | <b>EOT HBcrAg</b><br>HR: not significantly associated with VR<br><br><b>EOT HBV RNA</b><br>Cumulative incidence of 48-wk VR: $p = 0.00^*$<br>RNA undetectable: 36.6%<br>RNA <1.65 log U/ml: 52.1%<br>RNA >1.65 log U/ml: 93.2%<br>MV HR (>1.65 vs. <1.65 U/ml): 2.96 (1.78–4.93) $p = 0.00$<br><b>EOT HBsAg and EOT HBV RNA</b><br>Cumulative incidence of 48-wk VR: $p = 0.00$<br>RNA <1.65 log U/ml and HBsAg <10 IU/ml: 9.1%<br>RNA >1.65 log U/ml or HBsAg >10 IU/ml: 63.8% | <b>EOT HBcrAg</b><br>HR: not significantly associated with CR<br><br><b>EOT HBV RNA</b><br>MV HR (>1.65 vs. <1.65 log U/ml): 2.77 (1.21–6.33) $p = 0.02$                                                                                                                                                                                                                                                                                                                                                                                                                                                                                                                                                                   | <b>EOT HBcrAg</b><br>HR: not significantly associated with clearance<br><b>EOT HBV RNA</b><br>HR: not significantly associated with clearance                                                                                                                  |

(continued on next page)



Table 5 (continued)

| Paper                                                                                                                                                       | Relation with VR                                                                                                                                                                                                                                                                                                                                                                                                                                                                                                                                                                                                              | Relation with CR                                                                                                                                                                                                                                                                                                                                                                                                                                                                                                                                                                                                              | Relation with HBsAg clearance                                                                                                                                                                                                                                                                                                                                       |
|-------------------------------------------------------------------------------------------------------------------------------------------------------------|-------------------------------------------------------------------------------------------------------------------------------------------------------------------------------------------------------------------------------------------------------------------------------------------------------------------------------------------------------------------------------------------------------------------------------------------------------------------------------------------------------------------------------------------------------------------------------------------------------------------------------|-------------------------------------------------------------------------------------------------------------------------------------------------------------------------------------------------------------------------------------------------------------------------------------------------------------------------------------------------------------------------------------------------------------------------------------------------------------------------------------------------------------------------------------------------------------------------------------------------------------------------------|---------------------------------------------------------------------------------------------------------------------------------------------------------------------------------------------------------------------------------------------------------------------------------------------------------------------------------------------------------------------|
| Tseng, T.N., et al., 2020 <sup>26</sup><br>Baseline HBcrAg: 4.7 log U/ml<br>EOT HBcrAg: 2.9 log U/ml                                                        | <b>Baseline HBcrAg</b><br>Cumulative incidence of 5-yr VR: $p = 0.00^*$<br>HBcrAg <4 log U/ml: 23.8%<br>HBcrAg >4 log U/ml: 53%<br>UV HR per log U/ml: 1.28 (1.11-1.47) $p = 0.00$<br><b>EOT HBcrAg and baseline HBcrAg</b><br>Cumulative incidence of 5-yr VR: $p = 0.00$<br>HBcrAg <4 log U/ml and HBsAg <40 IU/ml: 5.9%<br>HBcrAg >4 log U/ml and HBsAg <40 IU/ml: 27.6%<br>HBcrAg <4 log U/ml and HBsAg >40 IU/ml: 57.3%<br>HBcrAg >4 log U/ml and HBsAg >40 IU/ml: 72.2%<br>MV HR (HBcrAg >4 log U/ml and HBsAg >40 IU/ml): 2.45 (1.82-3.30) $p = 0.00$<br><b>EOT HBcrAg</b><br>HR: not significantly associated with VR | <b>Baseline HBcrAg</b><br>Cumulative incidence of 5-yr CR: $p = 0.00^*$<br>HBcrAg <4 log U/ml: 13.9%<br>HBcrAg >4 log U/ml: 46.6%<br>UV HR per log U/ml: 1.33 (1.13-1.56) $p = 0.00$<br><b>EOT HBcrAg and baseline HBcrAg</b><br>Cumulative incidence of 5-yr CR: $p = 0.00$<br>HBcrAg <4 log U/ml and HBsAg <40 IU/ml: 2.8%<br>HBcrAg >4 log U/ml and HBsAg <40 IU/ml: 17%<br>HBcrAg <4 log U/ml and HBsAg >40 IU/ml: 34.2%<br>HBcrAg >4 log U/ml and HBsAg >40 IU/ml: 68.3%<br>MV HR (HBcrAg >4 log U/ml and HBsAg >40 IU/ml): 3.02 (2.03-4.50) $p = 0.00$<br><b>EOT HBcrAg</b><br>HR: not significantly associated with CR | <b>Baseline HBcrAg</b><br>HR: not significantly associated with clearance                                                                                                                                                                                                                                                                                           |
| Sonneveld, M.J., et al., 2021 <sup>31</sup><br>EOT HBcrAg:<br><2 log U/ml: 22% of patients<br>2-3 log U/ml: 23% of patients<br>>3 log U/ml: 54% of patients | <b>EOT HBcrAg</b><br>Cumulative incidence of 48-wk VR: $p < 0.001^*$<br>HBcrAg <2 log U/ml: 38%<br>HBcrAg 2-3 log U/ml: 50%<br>HBcrAg >3 log U/ml: 65%<br>MV OR (per log U/ml): 0.73 (0.62-0.86) $p < 0.001$<br>(MV OR referring to virological remission)<br><br><b>SCALE-B score evaluation</b><br>Cumulative incidence of 48-wk VR: $p < 0.001$<br>Low risk: 38%<br>Medium risk: 54%<br>High risk: 65%                                                                                                                                                                                                                     | <b>EOT HBcrAg</b><br>Cumulative incidence of 48-wk CR: $p = 0.018^*$<br>HBcrAg <2 log U/ml: 15%<br>HBcrAg 2-3 log U/ml: 9%<br>HBcrAg >3 log U/ml: 20%<br>MV OR (per log U/ml): 1.29 (1.08-1.54) $p = 0.005$<br><br><b>SCALE-B score evaluation</b><br>Cumulative incidence of 48-wk CR: $p < 0.001$<br>Low risk: 3%<br>Medium risk: 14%<br>High risk: 31%                                                                                                                                                                                                                                                                     | <b>EOT HBcrAg</b><br>Cumulative incidence of 48-wk HBsAg loss: $p < 0.001^*$<br>HBcrAg <2 log U/ml: 12%<br>HBcrAg 2-3 log U/ml: 3%<br>HBcrAg >3 log U/ml: 2%<br>MV OR (per log U/ml): 0.48 (0.33-0.68) $p < 0.001$<br><b>SCALE-B score evaluation</b><br>Cumulative incidence of 48-wk HBsAg loss: $p < 0.001$<br>Low risk: 11%<br>Medium risk: 2%<br>High risk: 1% |
| Xia, M., et al., 2021 <sup>33</sup><br>EOT HBV RNA: 23% undetected                                                                                          |                                                                                                                                                                                                                                                                                                                                                                                                                                                                                                                                                                                                                               | <b>EOT HBV RNA</b><br>Cumulative incidence of 6-yr CR: $p < 0.001^*$<br>RNA <3 log copies/ml: 24%<br>RNA 3-4.3 log copies/ml: 61%<br>RNA >4.3 log copies/ml: 100%<br>MV HR per log copies/ml: 1.34 $p < 0.001$<br>AUROC 0.760                                                                                                                                                                                                                                                                                                                                                                                                 | <b>EOT HBV RNA</b><br>Cumulative incidence of 6-yr HBsAg loss: $p = 0.007^*$<br>RNA <3 log copies/ml: 30.9%<br>RNA >3 log copies/ml: 1.6%                                                                                                                                                                                                                           |
| Kaewdech, A., et al., 2022 <sup>43</sup><br>EOT HBcrAg: 3.2 log U/ml<br>EOT HBV RNA: 2.0 log copies/ml                                                      | <b>SCALE-B</b><br>Cumulative incidence of 2-yr VR: $p < 0.001$<br>Low risk: 28.6%<br>Medium risk: 61%<br>High risk: 81.5%<br>MV HR (medium vs. low risk): 2.54 (0.88-7.35) $p = 0.086$<br>MV HR (high vs. low risk): 5.02 (1.75-14.39) $p = 0.003$<br><br><b>EOT HBV RNA</b><br>MV HR (>2 vs. <2 log U/ml): 0.69 (0.41-1.15) $p = 0.153$                                                                                                                                                                                                                                                                                      | <b>SCALE-B</b><br>MV HR (medium vs. low risk): 3.01 (0.38-23.87) $p = 0.30$<br>MV HR (high vs. low risk): 10.44 (1.38-79.08) $p = 0.02$<br>AUROC 0.81<br><br><b>EOT HBV RNA</b><br>MV HR (>2 vs. <2 log U/ml): 0.64 (0.30-1.35) $p = 0.24$<br>AUROC 0.66                                                                                                                                                                                                                                                                                                                                                                      | <b>SCALE-B</b><br>Cumulative incidence of 2-yr HBsAg loss: $p < 0.001$<br>Low risk: 14.3%<br>Medium risk: 2.4%<br>High risk: 0%<br>MV HR (med vs. low risk): 0.09 (0.01-0.52) $p = 0.008$<br>MV HR (high vs. low risk): 0.04 (0.00-0.43) $p = 0.007$<br><b>EOT HBV RNA</b><br>MV HR (>2 vs. <2 log U/ml): 0.20 (0.03-1.16) $p = 0.072$                              |

(continued on next page)

Table 5 (continued)

| Paper                                                                                                                                                          | Relation with VR | Relation with CR | Relation with HBsAg clearance                                                                                                                                                                                                                                                                                                                                                                                                                                                                                          |
|----------------------------------------------------------------------------------------------------------------------------------------------------------------|------------------|------------------|------------------------------------------------------------------------------------------------------------------------------------------------------------------------------------------------------------------------------------------------------------------------------------------------------------------------------------------------------------------------------------------------------------------------------------------------------------------------------------------------------------------------|
| Sonneveld, M.J., et al., 2022 <sup>45</sup><br>EOT HBcrAg:<br><2 log IU/ml: 22% of patients<br>2–3 log IU/ml: 19% of patients<br>>3 log IU/ml: 58% of patients |                  |                  | <b>EOT HBcrAg</b><br>Cumulative incidence of 3-yr HBsAg loss:<br>p <0.001*<br>HBcrAg <2 log IU/ml: 14.6%<br>HBcrAg >2 log IU/ml: 3.5%<br>MV HR (per log IU/ml): 0.718 (0.593–0.869)<br>p = 0.001<br><b>EOT HBsAg and EOT HBcrAg</b><br>Among patients with HBsAg <1 log IU/ml, no additive value of HBcrAg (HR = 1.08, p = 0.833)<br>Among patients with HBsAg 10–100 IU/ml:<br>MV HR (<2 vs. >2 log IU/ml): 3.397 p = 0.001<br>Among patients with HBsAg >2 log IU/ml:<br>MV HR (<2 vs. >2 log IU/ml): 3.702 p <0.001 |

In the first column, mean/median levels of explored biomarkers for each cohort are provided where available.

AUROC, area under region of curve; CR, clinical relapse; EOT, end of treatment; HBcrAg, hepatitis B core-related antigen; HR, hazard ratio; MV, multivariate; OR, odds ratio; UV, univariate; VR, virological relapse.

\* Cumulative rates of VR, CR, or functional cure stratified by the biomarker(s) of interest were summarised in Fig. 2A–C. †Serum HBV DNA is quantified using the COBAS Taqman HBV test, with a lower limit of detection of 20 IU/ml. This study specifically made a distinction between patients with undetectable HBV DNA (48.5%) and patients with HBV DNA <20 IU/ml (43.8%), which was not performed in other studies.

blood mononuclear cells (PBMCs) predicted off-treatment remission.

Regarding soluble immune markers (SIMs) in the context of treatment discontinuation, Wübbolding *et al.*<sup>32</sup> have proposed a combination of IL-2, CXCL9, CCL5, SCF and TRAIL to be an accurate prognostic marker for VR with an AUROC of 0.89.<sup>32</sup> Höner Zu Siederdisen *et al.*<sup>13</sup> found that levels of almost all SIMs increased after treatment cessation, significantly so for TNF, IL-12p70, and IL-10 at Week 4 post-EOT and for TNF and CXCL10/IP10 at Week 8 post-EOT. The increase in SIM levels was associated with VR and HBcrAg rebound, and subsequent decline and loss of HBsAg. Papatheodoridi *et al.*<sup>24</sup> reported that higher EOT IP10 levels at 1 month post-EOT identified patients more likely to achieve HBsAg loss, without mention of whether they underwent transient VR and CR first.

Finally, in terms of innate immunity, Zimmer *et al.*<sup>36</sup> studied changes in the natural killer (NK) cell response in HBV patients following treatment cessation. Stopping NA treatment significantly boosted CD56<sup>dim</sup> NK cell natural cytotoxicity responses, correlating with increased NK cell functional responses and ALT levels at Weeks 8 and 12 post-EOT. The subgroup of patients who cleared HBsAg experienced higher ALT levels at Week 12 post-EOT and demonstrated higher expression of CD38 on CD56<sup>dim</sup> NK cells, with increased NK cell functionality. Furthermore, Hall *et al.*<sup>42</sup> reported that severe hepatitis flares were associated with upregulation of the innate immune response, demonstrated by increased activity of TLR2-8 and TLR9 signalling in PBMCs and upregulation of TLR2 and TREM-1 receptor expression on NK cells at peak flare, with no such change from baseline in patients without flares. There was no significant correlation between TLR signalling activity and HBsAg decline or clearance.

#### HBV-specific immune markers

The association between EOT anti-HBc levels and rates of partial cure after treatment cessation appear unclear (Table 6). Chi *et al.*<sup>15</sup> found that anti-HBc was not significantly associated with VR, but reported a multivariate HR of 0.31 (0.15–0.65; p = 0.002) in predicting 4-yr CR. Patients with anti-HBc >3 log IU/ml demonstrated 4-yr CR rates of 21%, whereas those with anti-HBc <2 log IU/ml demonstrated 4-yr CR rates of 85%. Similar studies did not find a significant association between EOT anti-HBc levels and VR or CR.<sup>14</sup>

Several studies examined HBV-specific and global T cell populations in patients undergoing treatment cessation. We previously reported that frequencies of *in vitro*-expanded HBV-specific T cells both during and after discontinuation of therapy were consistently and significantly higher in patients without hepatic flares after treatment-cessation, in particular the responses against core and polymerase proteins.<sup>37</sup> Patients who did not develop a biochemical flare upon treatment cessation demonstrated increased gene expression encoding for program cell death protein 1 (PD-1) in CD8+ T cells. García-López *et al.*<sup>20</sup> found that patients who did not require retreatment demonstrated a higher percentage of degranulating CD8+ T cells (CD107a) in addition to polyfunctional CD8+ T cells co-producing IFN $\gamma$ /tumour necrosis factor-alpha (TNF $\alpha$ ). HBV-specific T cell responses did not augment following treatment withdrawal, and were not associated with the development of clinically relevant flares or HBsAg loss. Conversely, Rinker *et al.*<sup>35</sup> found a significant increase in HBV core-specific multifunctional T cell responses at 8 and 12 wk post-EOT, whereas no significant changes were observed following stimulation with polymerase- or envelope-

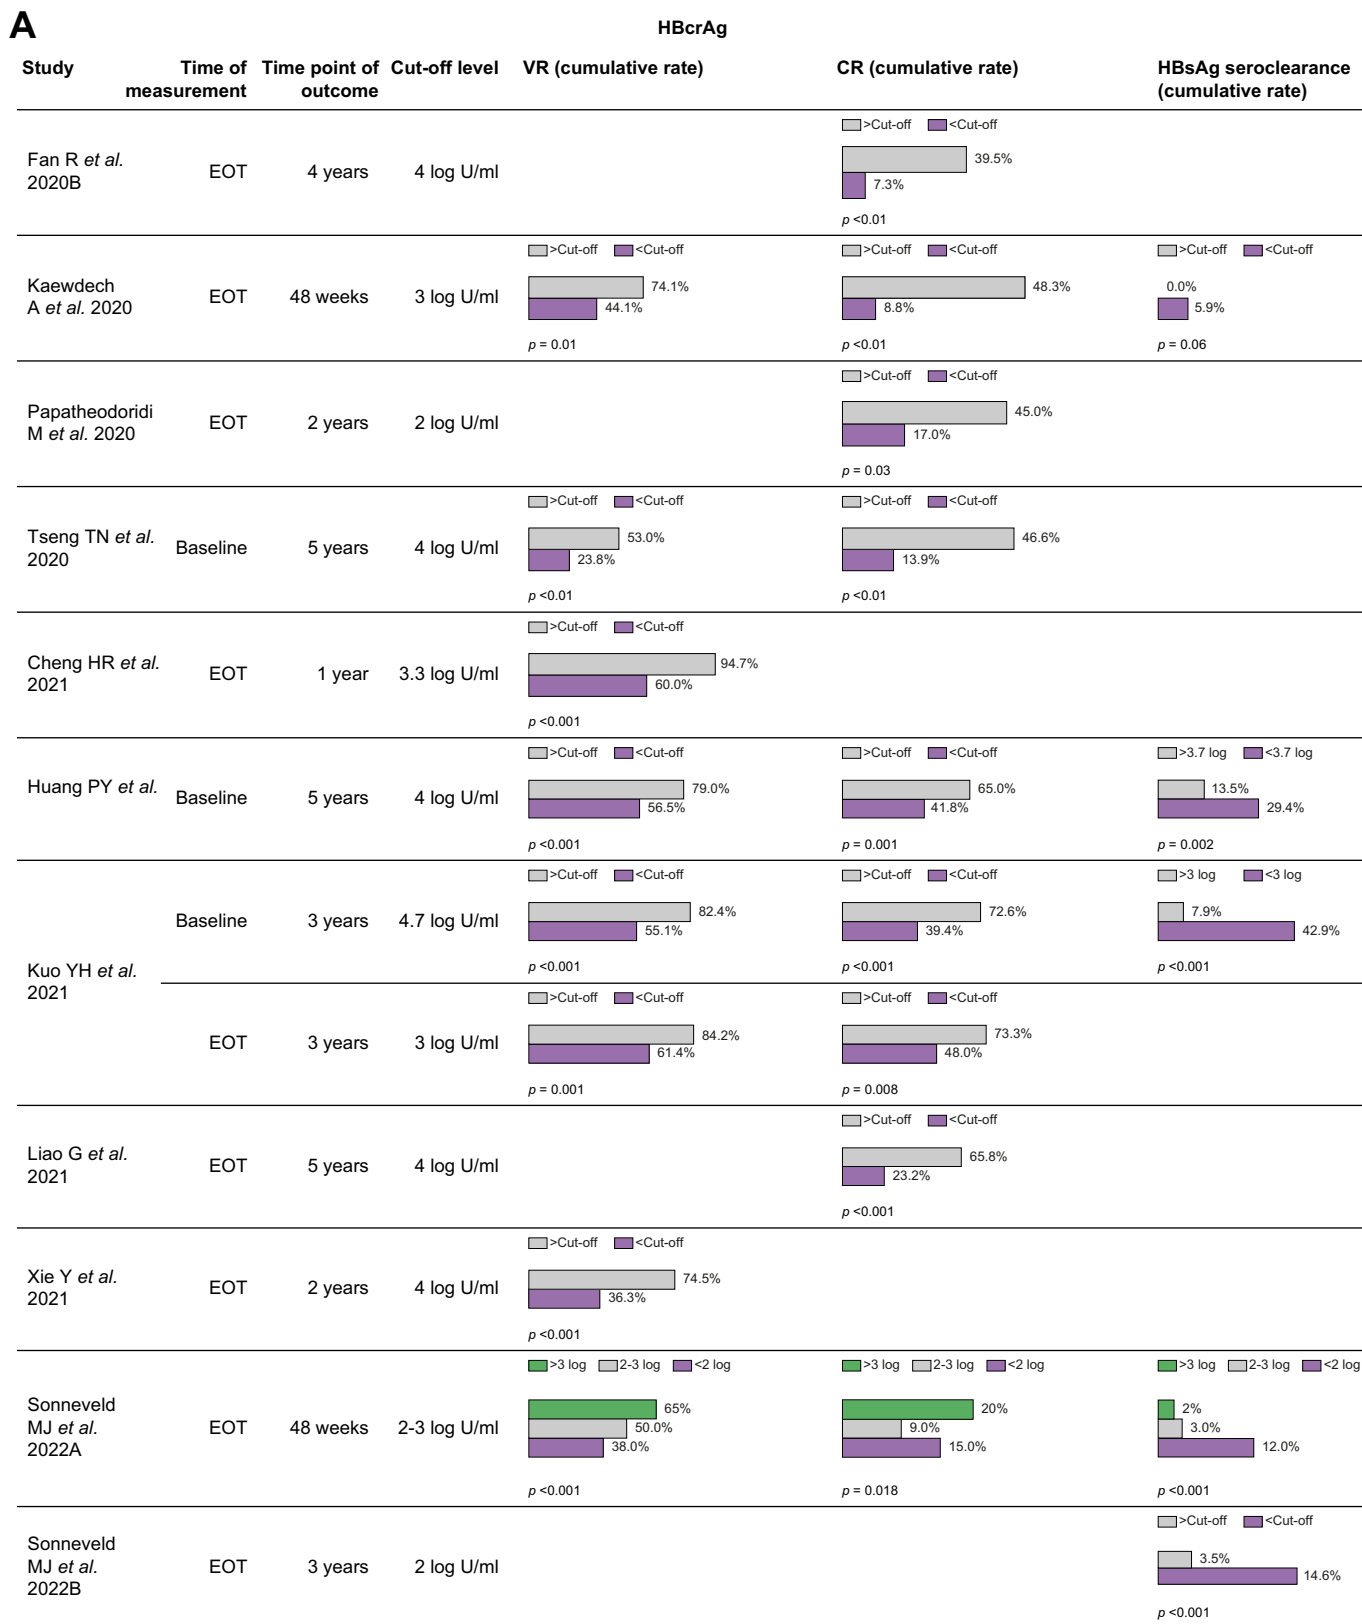

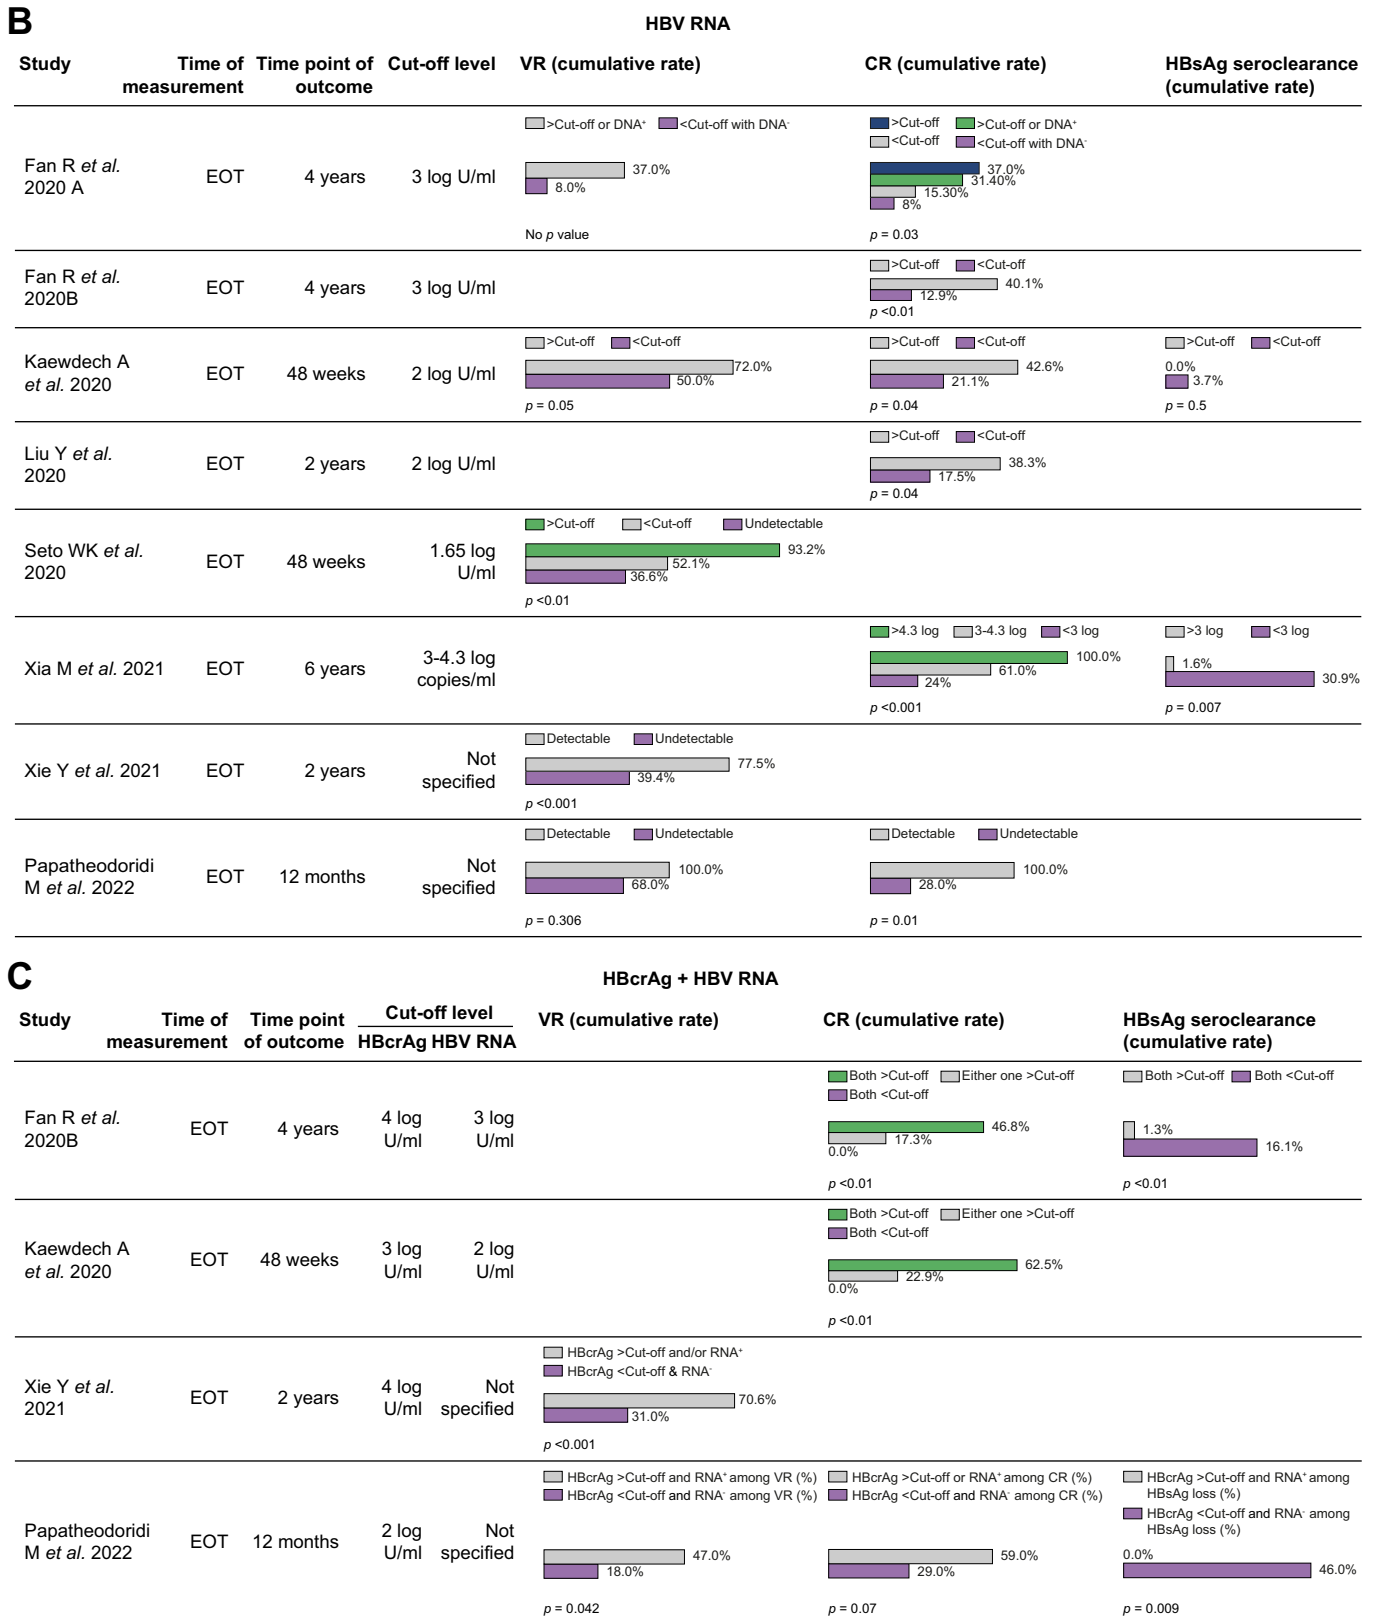

Fig. 2 (continued)

specific peptides. Patients experiencing functional cure demonstrated a less exhausted and more activated T cell phenotype, with increases in Ki-67 and CD38 expression at Week 12 post-EOT. HBV-specific CD4+ and CD8+ T cell responses were also significantly enhanced by PD-L1 blockade at Weeks 4 and 8 post-EOT. The findings from studies of HBV-specific immune markers are summarised in Table 6.

## Discussion

Rates of functional cure remain low in CHB patients who remain on antiviral therapy, as evidenced by an 8-yr cumulative incidence of 1.69% in ETV-treated patients and 1.34% in TDF-treated patients in a recent, large multi-ethnic study.<sup>46</sup> Treatment cessation in CHB patients has emerged as a possible strategy to achieve functional cure in select patients, but remains a controversial approach given concerns around safety of treatment withdrawal. Overall, the included studies report wide variations in off-therapy outcomes, owing to the heterogeneity of patient populations and stopping criteria. Patient factors, such as ethnicity,<sup>47</sup> have been demonstrated to play a role alongside EOT HBsAg levels<sup>45</sup> and sustained off-therapy response<sup>48,49</sup> in achieving functional cure after treatment discontinuation. However, there is interest in leveraging additional factors to forecast off-therapy HBsAg loss with more certainty. Given the limitations of current treatment strategies in CHB, the aim of this review was to evaluate how the data from treatment discontinuation studies could be applied to the functional cure programme to better predict treatment response and ultimately HBsAg loss.

Reliable biomarkers are essential to identify individuals where NA therapy can be discontinued safely and functional cure achieved. It is well established that the correlation between serum HBsAg level and cccDNA exists only in the HBeAg-positive phase of CHB infection.<sup>50,51</sup> Following HBeAg seroconversion, there is continued production of HBsAg, partly from integrated HBV DNA in hepatocytes, and in fact the fraction of integrated HBV DNA as a fraction of total intrahepatic HBV DNA is significantly higher in HBeAg-negative patients compared with HBeAg-positive patients.<sup>52</sup> To this end, HBcrAg, which represents the combined antigenic reactivity of e-antigen, core antigen, and defective core-related protein p22cr, has been shown to more strongly correlate with cccDNA quantity in both patients that are treatment naive<sup>53</sup> and on NA therapy.<sup>54</sup> In situations where serum HBV DNA has become undetectable, the presence of HBcrAg indicates continued secretion of viral-end products. Conversely, serum HBV RNA reflects the amount of virion-like encapsidated particles in which pgRNA was non- or partially reverse transcribed.<sup>55</sup> Undetectable HBV RNA despite the

persistence of cccDNA in most patients with HBsAg loss after treatment cessation may demonstrate a functional reduction in cccDNA transcriptional activity.<sup>20</sup>

Our review suggests that EOT HBV RNA and EOT HBcrAg are both strong predictors for sustained partial cure across the included studies, but both markers also have their limitations. The decline in HBcrAg across treatment may result in an EOT level that falls below the accepted lower limit of detection, especially among HBeAg-negative patients, and as a result this assay may not be able to reflect very low but persistent levels of cccDNA. Similarly, Liu *et al.*<sup>23</sup> reported that the lack of highly sensitive methods of detection for HBV RNA may result in a low threshold for undetectable RNA levels. Standardisation of cut-offs of viral markers (especially HBV RNA) in terms of method of detection and quantification is of paramount importance to allow fair comparison between various settings. Although previous studies have failed to find a strong correlation between either of these biomarkers and functional cure, the CREATE study group<sup>45</sup> recently pooled multiple large-scale cohorts to conclude that EOT HBcrAg, in isolation or in combination with EOT HBsAg, was significantly associated with HBsAg seroclearance. Various combinations of viral markers have also shown potential in predicting off-therapy responses, but the evidence behind SCALE-B score is the most substantial, having been validated for clinical relapse, retreatment, and HBsAg loss.

We propose an algorithm, stratified by HBeAg status at NA initiation, based on EOT qHBsAg, in combination with HBcrAg and HBV RNA to decide whether NA should be discontinued in CHB patients (Fig. 3). In general, NA should be continued if EOT qHBsAg is  $\geq 2$  log. NA cessation can be considered when the EOT qHBsAg  $< 2$  log in combination with HBV RNA  $< 3$  log or HBcrAg  $< 4$  log for initially HBeAg-positive patients. As the sensitivity of HBcrAg in HBeAg-negative patients is lower, undetectable HBcrAg should not be over interpreted in this scenario; NA cessation could only be considered when HBV RNA is  $< 2$  log or undetectable.

Our understanding of CHB infection is also defined by the patient's innate and adaptive immune responses.<sup>56</sup> The hallmark of CD8+ T cell exhaustion is loss of proliferative capacity, cytotoxicity, and cytokine production, which is enhanced through the upregulation of inhibitory pathways with continued antigen and viral load exposure.<sup>57</sup> Regarding innate immunity, NK cells appear to act in inverse correlation to T cells. Their inhibition of CD4+ T cells is likely necessary to limit persistent T cell activation, yet their reversion to a quiescent phenotype is reflective of restoration of HBV-specific T cell function.<sup>58</sup> The adaptive humoral response is driven by the role of B cells, which are activated by T-cell dependent and independent pathways to produce disease-specific antibodies. In CHB, HBsAg specific B cells

**Fig. 2. Cumulative rates of VR, CR, or functional cure.** (a) Cumulative rates of VR, CR, or functional cure stratified by HBcrAg. Each row represents a single study. The bar charts demonstrate the cumulative rate, shown as %, of the specific outcome (VR, CR, or HBsAg seroclearance) stratified by whether HBcrAg was above the specified cut-off level. For instance, in Fan *et al.*<sup>19</sup>, the 4-yr cumulative rate of CR was 39.5% and 7.3% when the end-of-treatment HBcrAg was  $> 4$  log and  $< 4$  log, respectively ( $p < 0.01$ ). (b) Cumulative rates of VR, CR, or functional cure stratified by HBV RNA. Each row represents a single study. The bar charts demonstrate the cumulative rate, shown as %, of the specific outcome (VR, CR, or HBsAg seroclearance) stratified by whether HBV RNA was above the specified cut-off level. For instance, in Fan *et al.*,<sup>18</sup> the 4-yr cumulative rate of VR was 37.0% and 8.0% when the end-of-treatment HBV RNA was  $> 3$  log and  $< 3$  log, respectively (no  $p$  value). (c) Cumulative rates of VR, CR, or functional cure stratified by HBcrAg + HBV RNA. Each row represents a single study. The bar charts demonstrate the cumulative rate, shown as %, of the specific outcome (VR, CR, or HBsAg seroclearance) stratified by whether HBcrAg and/or HBV RNA was above the specified cut-off level. For instance, in Fan *et al.*,<sup>19</sup> the 4-yr cumulative rate of HBsAg seroclearance was 16.1% when the end-of-treatment HBcrAg was  $< 4$  log + HBV RNA  $< 3$  log, compared with 1.3% when HBcrAg was  $> 4$  log + HBV RNA  $> 3$  log ( $p < 0.01$ ). CR, clinical relapse; EOT, end of treatment; VR, virological relapse.



**Table 6. Summary of novel immune markers.**

| Paper                                                        | Relation with VR                                                                                                                                                                                                                                                                                                                                                                                                                                                                                                                                                                                                                                                                                                                                                                                                                                                                                                                   | Relation with CR                                                                                                                                                                                                                                                                        | Relation with HBsAg clearance |
|--------------------------------------------------------------|------------------------------------------------------------------------------------------------------------------------------------------------------------------------------------------------------------------------------------------------------------------------------------------------------------------------------------------------------------------------------------------------------------------------------------------------------------------------------------------------------------------------------------------------------------------------------------------------------------------------------------------------------------------------------------------------------------------------------------------------------------------------------------------------------------------------------------------------------------------------------------------------------------------------------------|-----------------------------------------------------------------------------------------------------------------------------------------------------------------------------------------------------------------------------------------------------------------------------------------|-------------------------------|
| <b>Single nucleotide pleomorphisms</b>                       |                                                                                                                                                                                                                                                                                                                                                                                                                                                                                                                                                                                                                                                                                                                                                                                                                                                                                                                                    |                                                                                                                                                                                                                                                                                         |                               |
| Su, T.H., <i>et al.</i> , 2018 <sup>14</sup>                 | <b>CTLA (rs231775) non-GG vs. GG genotype:</b><br>MV HR: 1.74 (1.01–3.00) $p = 0.048$                                                                                                                                                                                                                                                                                                                                                                                                                                                                                                                                                                                                                                                                                                                                                                                                                                              | <b>CTLA4 (rs231775) non-GG vs. GG genotype:</b><br>MV HR: 2.06 (1.04–4.11) $p = 0.039$                                                                                                                                                                                                  |                               |
| Wu, Y., <i>et al.</i> , 2019 <sup>39</sup>                   |                                                                                                                                                                                                                                                                                                                                                                                                                                                                                                                                                                                                                                                                                                                                                                                                                                                                                                                                    | <b>CXCR5 (rs676925) GC vs. CC genotype:</b><br>MV OR: 0.25 (0.07–0.95) $p = 0.0042$<br><b>CXCR5 (rs676925) non-CC vs. CC genotype:</b><br>MV HR: 0.34 (0.12–0.96) $p = 0.041$<br>No difference in number or MFI of CXCR5-positive cells or plasma CXCL13 levels between genotype groups |                               |
| <b>Gene expression levels</b>                                |                                                                                                                                                                                                                                                                                                                                                                                                                                                                                                                                                                                                                                                                                                                                                                                                                                                                                                                                    |                                                                                                                                                                                                                                                                                         |                               |
| Kranidioti, H., <i>et al.</i> , 2019 <sup>38</sup>           | Remission associated with lower expression of:<br><b>CCL20:</b> 14-fold decrease $p = 0.03$<br>AUROC 0.929<br><b>CCL4:</b> 5.9-fold decrease $p = 0.02$<br>UV OR: 27.57 (0.65–1165.96) $p = 0.053$<br><b>CXCL2:</b> 18-fold decrease $p = 0.02$<br><b>CXCL3:</b> 17.6-fold decrease $p = 0.01$<br>AUROC 0.857<br><b>IFN<math>\gamma</math>:</b> 5.3-fold decrease $p = 0.01$<br>UV OR: 3.46 (1.11–10.79) $p = 0.032$<br>AUROC 0.871<br><b>IL-8:</b> 5.7-fold decrease $p = 0.01$<br>UV OR: 2.97 (1.01–8.73) $p = 0.048$<br>AUROC 0.871<br><b>IL-1A:</b> 61-fold decrease $p = 0.03$<br><b>IL-1B:</b> 8.6-fold decrease $p = 0.05$<br><b>FASLG:</b> 2-fold decrease $p = 0.01$<br>UV OR: 29.78 (1.38–643.08) $p = 0.030$<br>AUROC 0.857<br><b>TNFRSF9:</b> 2.9-fold decrease $p = 0.05$<br>Combination of CCL4, IFN $\gamma$ , IL-8, and FASLG predicted off-treatment remission with sensitivity 71.4–85.7% and specificity 80–90% | Patients achieving HBsAg loss had significantly lower expression of:<br><b>FASLG</b> $p = 0.04$<br><b>IL-8</b> $p = 0.02$<br><b>CCL4</b> $p = 0.008$<br><b>IFN<math>\gamma</math></b> $p = 0.06$                                                                                        |                               |
| Serum cytokine/chemokine (immune marker) levels              |                                                                                                                                                                                                                                                                                                                                                                                                                                                                                                                                                                                                                                                                                                                                                                                                                                                                                                                                    |                                                                                                                                                                                                                                                                                         |                               |
| Höner Zu Siederdisen, C., <i>et al.</i> , 2016 <sup>13</sup> | <b>SIM levels at EOT vs. Week 4 post-EOT (VR)</b><br><b>IL-10:</b> 8.65 → 13.96 pg/ml $p = 0.048$<br><b>IL-12p70:</b> 14.46 → 25.29 pg/ml $p = 0.012$<br><b>CXCL10/IP10:</b> 1,223 → 1,533 pg/ml $p = 0.002$<br><b>TNF<math>\alpha</math>:</b> 18.77 → 57.68 $p = 0.027$<br>CXCL10 and TNF $\alpha$ remained significantly elevated at Week 8                                                                                                                                                                                                                                                                                                                                                                                                                                                                                                                                                                                      |                                                                                                                                                                                                                                                                                         |                               |

(continued on next page)

Table 6 (continued)

| Paper                                         | Relation with VR                                                                                                                                                                                                                                                                                                                                                                                                                                      | Relation with CR                                                                                                                                                                                                                                                                                                                                                                                                                                                                                                                                                               | Relation with HBsAg clearance                                                                                                                                                                                                                                                                                                                  |
|-----------------------------------------------|-------------------------------------------------------------------------------------------------------------------------------------------------------------------------------------------------------------------------------------------------------------------------------------------------------------------------------------------------------------------------------------------------------------------------------------------------------|--------------------------------------------------------------------------------------------------------------------------------------------------------------------------------------------------------------------------------------------------------------------------------------------------------------------------------------------------------------------------------------------------------------------------------------------------------------------------------------------------------------------------------------------------------------------------------|------------------------------------------------------------------------------------------------------------------------------------------------------------------------------------------------------------------------------------------------------------------------------------------------------------------------------------------------|
| Xie, L., et al., 2019 <sup>40</sup>           |                                                                                                                                                                                                                                                                                                                                                                                                                                                       | <b>EOT sST2 levels</b><br>UV HR per log pg/ml:<br>2.82 (0.73–10.85) $p = 0.132$<br>UV HR (>3.7 vs. <3.7 log pg/ml):<br>1.72 (0.84–3.51) $p = 0.137$<br><b>12-wk post-EOT sST2 levels</b><br>MV HR per log pg/ml:<br>4.40 (2.17–8.93) $p < 0.001$<br>Patients with CR demonstrated a rising sST2 trend<br>post-EOT and experienced higher sST2 levels at<br>wk 12, 24, and 48 post-EOT compared with patients without CR                                                                                                                                                        |                                                                                                                                                                                                                                                                                                                                                |
| Papathodoridi, M., et al., 2020 <sup>24</sup> |                                                                                                                                                                                                                                                                                                                                                                                                                                                       |                                                                                                                                                                                                                                                                                                                                                                                                                                                                                                                                                                                | <b>EOT IP10 levels</b><br>HR per 10 pg/ml: 1.03 (0.99–1.07) $p = 0.01$<br><b>1 month post-EOT IP10 levels</b><br>HR per 10 pg/ml: 1.10 (1.02–1.19) $p = 0.01$<br>Compared with EOT, IP10 levels were higher at months 2 ( $p < 0.001$ ) and 3 ( $p = 0.024$ ), similar at month 6 ( $p = 0.195$ ) and lower at months 9 and 12 ( $p < 0.004$ ) |
| Wübbolding, L.A., et al., 2021 <sup>32</sup>  | <b>EOT SIM levels</b><br><b>IL-2:</b> lower in VR $p = 0.002$<br><b>IL-6:</b> lower in VR $p = 0.021$<br><b>MIP-1a/CCL3:</b> lower in VR $p = 0.027$<br><b>RANTES/CCL5:</b> higher in VR $p = 0.039$<br><b>IL-7:</b> lower in VR $p = 0.042$<br>All single SIMs had AUROCs <0.67 for VR<br><b>IL-2, CXCL9, RANTES/CCL5, SCF, TRAIL</b><br>EOT AUROC: 0.89 (0.5–0.99)<br>12 wk pre-EOT AUROC: 0.76 (0.34–0.99)<br>24 wk pre-EOT AUROC: 0.78 (0.1–0.99) |                                                                                                                                                                                                                                                                                                                                                                                                                                                                                                                                                                                |                                                                                                                                                                                                                                                                                                                                                |
| <b>HBV-specific T cell activity</b>           |                                                                                                                                                                                                                                                                                                                                                                                                                                                       |                                                                                                                                                                                                                                                                                                                                                                                                                                                                                                                                                                                |                                                                                                                                                                                                                                                                                                                                                |
| Su, T. H., et al., 2018 <sup>14</sup>         | EOT Anti-HBc<br>MV HR per log IU/ml:<br>2.89 log IU/ml in ETV patients, 2.63 log IU/ml in TDF patients<br>0.92 (0.55–1.56) $p = 0.768$<br>Not significant                                                                                                                                                                                                                                                                                             | EOT Anti-HBc<br>MV HR per log IU/ml:<br>0.83 (0.45–1.54) $p = 0.551$<br>Not significant                                                                                                                                                                                                                                                                                                                                                                                                                                                                                        | N/A                                                                                                                                                                                                                                                                                                                                            |
| Chi, H., et al., 2019 <sup>15</sup>           | <b>EOT Anti-HBc</b><br>EOT Anti-HBc:<br>UV HR per log IU/ml:<br>2.8 log IU/ml in eAg+ patients, 2.5 log IU/ml in eAg- patients<br>0.69 (0.45–1.06) $p = 0.088$<br>Not significant                                                                                                                                                                                                                                                                     | <b>EOT Anti-HBc</b><br>Cumulative incidence of 4-yr CR: $p < 0.05$<br>Anti-HBc >3 log IU/ml: 21%<br>Anti-HBc 2–3 log IU/ml: 50%<br>Anti-HBc <2 log IU/ml: 85%<br>MV HR per log IU/ml: 0.31 (0.15–0.65) $p = 0.002$<br>Patients with CR experienced an anti-HBc increase of 3.6 log IU/ml per yr, while those with SR experienced an anti-HBc increase of 0.5 log IU/ml per year<br><b>EOT Anti-HBc and EOT HBsAg</b><br>Cumulative incidence of 4-yr CR: $p = 0.009$<br>HBsAg >2 log IU/ml and anti-HBc >3 log IU/ml: 27%<br>HBsAg >2 log IU/ml and anti-HBc <3 log IU/ml: 64% | N/A                                                                                                                                                                                                                                                                                                                                            |

(continued on next page)

Table 6 (continued)

| Paper                                                | Relation with VR | Relation with CR                                                                                                                                                                                                                                                                                                                                                                                                                                                                                                                                                                                                                                                                                    | Relation with HBsAg clearance                                                                                                                                                                                                                                                                                                                                        |
|------------------------------------------------------|------------------|-----------------------------------------------------------------------------------------------------------------------------------------------------------------------------------------------------------------------------------------------------------------------------------------------------------------------------------------------------------------------------------------------------------------------------------------------------------------------------------------------------------------------------------------------------------------------------------------------------------------------------------------------------------------------------------------------------|----------------------------------------------------------------------------------------------------------------------------------------------------------------------------------------------------------------------------------------------------------------------------------------------------------------------------------------------------------------------|
| Rinker, F., <i>et al.</i> , 2018 <sup>35</sup>       |                  |                                                                                                                                                                                                                                                                                                                                                                                                                                                                                                                                                                                                                                                                                                     | Patients achieving HBsAg loss demonstrated a T cell phenotype with lowly expressed PD-1 and KLRG1, and an increase in expression of Ki-67 and CD38 at Week 12 post-EOT<br>Baseline HBsAg was positively correlated with PD-1+ CD8+ T cells, and fold decline of HBsAg at month 12 post-EOT was associated with frequency of Ki-67+ CD38+ T cells at Week 12 post-EOT |
| Rivino, L., <i>et al.</i> , 2018 <sup>37</sup>       |                  | The HBV-specific T cell response, mainly targeting core and polymerase proteins, was at least not superior in patients who flared Patients who did not flare demonstrated increased expression of the most differentially expressed gene, PD-1 ( $p = 0.009$ ) in CD8+ T cells                                                                                                                                                                                                                                                                                                                                                                                                                      |                                                                                                                                                                                                                                                                                                                                                                      |
| García-López, M., <i>et al.</i> , 2020 <sup>20</sup> |                  | Patients remaining off-therapy had functional HBV-specific CD8+ T cell responses against epitopes from multiple HBV proteins, (68% vs. 20%, $p = 0.048$ for IFN $\gamma$ production and 77% vs. 40% $p = 0.099$ for CD107a expression)<br>The percentage of degranulating CD8+ T cells (CD107a) was higher at EOT and Week 12 post-EOT in patients remaining off therapy ( $p = 0.039$ and $p = 0.0093$ ) when stimulated with core proteins<br>The percentage of polyfunctional core-specific CD8+ T cells (co-expressing IFN $\gamma$ and TNF $\alpha$ ) was higher among patients remaining off-therapy ( $p = 0.031$ ) and this increase persisted for more than a year post-EOT ( $p = 0.01$ ) |                                                                                                                                                                                                                                                                                                                                                                      |
| <b>NK cell activity</b>                              |                  |                                                                                                                                                                                                                                                                                                                                                                                                                                                                                                                                                                                                                                                                                                     |                                                                                                                                                                                                                                                                                                                                                                      |
| Zimmer, C.L., <i>et al.</i> , 2018 <sup>36</sup>     |                  |                                                                                                                                                                                                                                                                                                                                                                                                                                                                                                                                                                                                                                                                                                     | Patients achieving HBsAg loss experienced higher ALT levels and higher CD56dim NK cell expression of CD38 at 12 wk post-EOT<br>Patients achieving HBsAg loss experienced elevated responses upon K562 stimulation at 12 wk post-EOT, particularly CD56dim NK cell IFN $\gamma$ , TNF, and GM-CSF responses                                                           |

(continued on next page)

Table 6 (continued)

| Paper                                    | Relation with VR                                                                                                                                                                                                                                                                                                                                                                                                                                                                                          | Relation with CR | Relation with HBsAg clearance |
|------------------------------------------|-----------------------------------------------------------------------------------------------------------------------------------------------------------------------------------------------------------------------------------------------------------------------------------------------------------------------------------------------------------------------------------------------------------------------------------------------------------------------------------------------------------|------------------|-------------------------------|
| Hall, S.A.L., et al., 2022 <sup>42</sup> | Hepatitis flares were associated with significant increases in TNF, IL-6 and IL-8 cytokine production after PBMC TLR signalling with stimulation from TLR ligands, whereas patients who did not flare demonstrated no significant changes to baseline Hepatitis flare was associated with increased expression of TREM-1 and TLR2 on NK-bright and NK-T cells, and increased expression of TLR2 alone on NK-dim cells, whereas patients who did not flare demonstrated no significant changes to baseline |                  |                               |

AUROC, area under region of curve; CR, clinical relapse; EOT, end of treatment; HBsAg, hepatitis B surface antigen; HR, hazard ratio; IP10, interferon gamma-induced protein 10; MV, multivariate; OR, odds ratio; UV, univariate; VR, virological relapse.

demonstrate defective antibody production and an accumulation of atypical memory B cells with increased expression of inhibitory receptors.<sup>59,60</sup> Although all exposed individuals mount an antibody response to HBcAg, higher anti-HBc levels in CHB infection may represent a larger number of activated B cells, which in turn modulate CD4+ and CD8+ T cell activity, and augment naive T-helper cells through their highly potent antigen-presenting function.<sup>61</sup>

Although the high levels of antigen expression in hepatocytes result in T cell exhaustion and deletion, evidence suggests that long-term antiviral therapy only results in a partial reconstitution of the T cell response. Following *in vitro* expansion experiments, the HBV-specific polyfunctional T cell response of successfully treated CHB patients (with HBsAg loss) was comparable with patients with spontaneously resolving acute HBV infection. In contrast, in NA-treated CHB patients who were HBV DNA negative but remain HBsAg positive, T cell responses were notably weaker, compounded by the slow decline in HBsAg on long-term NA.<sup>62,63</sup> Therefore, there is growing interest in treatment interruption or discontinuation as a strategy to boost the host immune response to facilitate functional cure.

Although studies that explore SIMs in the context of NA cessation demonstrate low replicability potential and lack of disease specificity, it was observed that VR preceded cytokine upregulation and ALT flare, and subsequent HBsAg decline.<sup>13,64,65</sup> This suggests that a transient virological rebound, with or without subsequent clinical relapse, may assist in the immune-mediated killing of infected hepatocytes and non-cytolytic degradation of cccDNA. This is in contrast to previous studies that have shown that sustained off-therapy response is associated with higher chance of functional cure,<sup>48,49,66</sup> and the role of VR in achieving HBsAg loss remains controversial. We previously demonstrated that increased frequencies of HBV core and polymerase-specific T cells were a promising immunological biomarker for patients who did not experience hepatic flares following treatment cessation, and that hepatic flares were in fact not driven by HBV-specific T-cell responses.<sup>37</sup> Recently, a logistic regression model predicting on-treatment presence of functional HBV-specific CD8+ T-cell response has demonstrated a positive correlation with off-treatment HBsAg decline and loss.<sup>67</sup> Furthermore, treatment cessation itself triggers a new immunological environment that has been shown to increase frequency and functionality of HBV core-specific T-cell responses in patients achieving functional cure.<sup>35</sup>

### Interpretation of these findings and the path to HBV functional cure

*Can NA discontinuation act as an immunomodulator in the functional cure program?*

From murine models<sup>68</sup> and clinical studies discussed above, a restored immune response against HBV appears to be the prerequisite for a *de novo* response against HBV during chronic infection. The reappearance of HBV replication after stopping long-term NA treatment could in fact be the necessary trigger for the immune response<sup>69</sup> and the effect of viral rebound-induced immune reinvigoration has been shown in a few studies.<sup>13,68</sup> A delicate balance exists between the potential immunological benefits of NA discontinuation (*i.e.* accelerated rates of HBsAg decline/clearance) and the risk of excessive hepatocyte damage and resultant liver failure. To this end, transient VR in absence of a serious clinical flare should be viewed differently from a sustained rise in viraemia levels off-therapy, but this has been

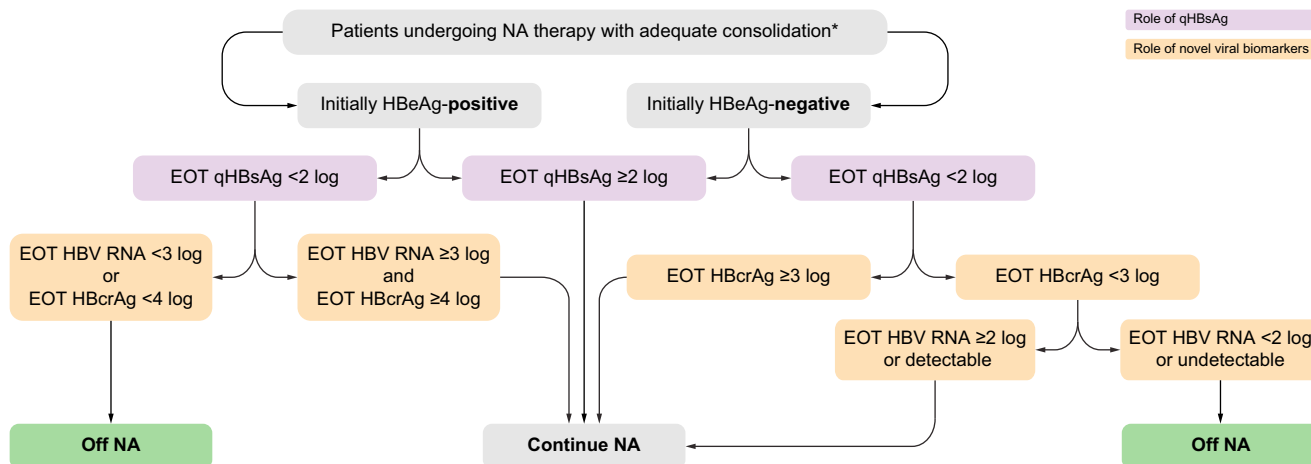

**Fig. 3. Proposed algorithm to decide whether NA should be discontinued based on qHBsAg, HBcrAg, and HBV RNA stratified by HBeAg status.** Refer to Table S1 for the guideline-recommended duration of consolidation therapy. EOT, end of treatment; HBcrAg, hepatitis B core-related antigen; HBeAg, hepatitis B envelope antigen; NA, nucleoside analogue; qHBsAg, quantitative hepatitis B surface antigen.

poorly delineated in NA discontinuation studies to date, which mostly define VR by a single timepoint.

Patients achieving functional cure following NA discontinuation demonstrate two important events: firstly, a reduction in viral antigen level, and second, evidence of immune recovery. Therefore, any novel approaches intended to enhance functional cure should follow this rule by combining virus-directing agents with immunomodulators. There are no pre-clinical/clinical studies to date which have evaluated this sequence using novel agents. This combination effect was found to be effective in mice given siRNA (viral antigen knockdown) followed by therapeutic vaccine (composed of recombinant HBV protein), whereby antigen load shift was induced to end the immune tolerance.<sup>70</sup> The safety and feasibility of NA discontinuation as a strategy for immune recovery should be guided by EOT antigenic loads. In selected patient groups; characterised by low HBsAg levels, low EOT HBcrAg and/or HBV RNA; NA discontinuation could be utilised in conjunction with virus-directed agents to achieve functional cure without risk of severe CR. However, the safety of this approach could not be over-emphasised, especially after the incidence of a subacute liver failure case necessitating liver transplantation in the REEF-2 study (patient in the placebo arm was continued on TDF for 48 wk which was then stopped).<sup>71</sup> Across all included studies, there was a maximum of 15 decompensation events mentioned in six studies, leading to two liver-related deaths (taking into consideration overlapping study cohorts). Although the consensus between studies is that retreatment almost always leads to re-compensation and renewed viral control, there is still a possibility of hepatic decompensation and its sequelae, such as transplantation and death. This was highlighted by a recent meta-analysis which showed that severe hepatitis flares or decompensation would occur in 1.21% and liver transplantation or death was observed in 0.37% following NA discontinuation.<sup>72</sup> Regardless of whether NA discontinuation is used as part of a novel combination therapy, close monitoring is essential and standardisation of retreatment criteria will be inevitable to minimise the associated risks.

#### How can viral markers help to predict response to novel agents?

The results of our review showed that the viral biomarkers that act as a surrogate for transcriptionally active cccDNA are helpful to predict off-therapy partial cure and, to some extent, functional cure. In addition, the timing of assessment has implications on the outcome, and the most commonly used and practical time-point has been EOT (i.e. end of NA therapy). Recent data suggest that early on-treatment profiles of HBcrAg and HBV RNA can help to identify future responders (HBsAg seroclearance or <2 logs) as early as Week 4 of NA therapy.<sup>73</sup> Early biomarker response suggests effective restoration of antiviral immunity, and potentially identifies those likely to achieve HBsAg reduction or seroclearance following treatment. Those with high baseline viral markers or poor viral biomarker response on treatment with novel agents should be continued on NA.

It remains to be determined whether novel agents inducing viral antigen reduction and passive restoration of the immune response will lead to the same sustainable HBsAg seroclearance as observed following long-term NA. Another unanswered question is whether differentiating the HBsAg source (cccDNA vs. integrated DNA) would help to predict risk of severe flare following NA discontinuation/novel treatment strategy. As only hepatocytes containing transcriptionally active cccDNA have the potential to replicate virus and become susceptible to immune attack upon NA discontinuation or immune modulation, those with HBsAg predominantly from integrated DNA have a theoretically lower risk of severe VR or CR if NAs are discontinued or immunomodulators introduced.

#### Immune assessment – a practical perspective

Ideally, the demonstration of a multi-faceted, poly-cellular immune response together with an assessment of an appropriate panel of inflammatory SIMs would be needed to prove immune restoration. However, as previously discussed, SIMs are heterogeneous, non-specific, and so far, inconclusive. Moreover, we lack robust and reproducible assays to predict pro-inflammatory cytokine production with novel therapeutic approaches. To allow a more accessible and reproducible assessment, we propose that HBV-specific T cells should be the immune marker of choice for



predicting functional cure on antiviral treatment. The frequency of these T cells, the level of PD-1 expression, and functionality (e.g. CD107a expression, IFN $\gamma$  production on CD8+ T cells) are relatively specific readouts and efforts are underway to standardise the experimental assays, as well as implement them in all novel clinical trials moving forward.<sup>74</sup> For patients receiving immunomodulators, one needs to differentiate responses as being target engagement only or reflecting recovery of the immune response. Ideally, the paired assessment of intra-hepatic HBV-specific T cells in the clinical trial setting would be valuable to inform whether peripheral blood T-cell responses are sufficiently informative.<sup>75</sup>

### Limitations

The limitations regarding the clinical utility of viral markers are the recognised shortfalls in both sensitivity and standardisation. HBcrAg was measured by the Chemiluminescent Enzyme Immunoassay system (Fujirebio, Inc, Tokyo, Japan) in all studies. Although the automated estimation range is quoted as 2–7 log U/ml, the validated lower limit of detection is 3 log U/ml. As a result, readings between 2 and 3 log U/ml are not reliable and many studies state that a large proportion of patients return undetectable readings. In the absence of a unified standard, a range of different HBV RNA assays, platforms, and lower limits of detection have been adopted in the included studies (Table S3). Moreover, most findings from immune marker studies are yet to be comprehensively validated in further independent samples to affirm reproducibility of results. Furthermore, there is also a recognised distinction between *in vitro* expansion and *ex vivo* conditions in the generation of immunological data. Unfortunately, we were unable to perform a meta-analysis of the novel markers

presented in this review owing to the heterogeneity of the data. There was variation in the cut-offs used for viral markers and the timepoints at which VR, CR, and HBsAg loss were measured. Furthermore, many of these studies had overlapping (but not identical) cohorts, which would have disproportionately skewed the results of a meta-analysis.

### Conclusions

Treatment discontinuation has emerged as a valid therapeutic option to maintain partial cure, and has also been associated with higher rates of functional cure compared to patients who remain on long-term NA therapy when trialled in select populations. Nonetheless, treatment discontinuation remains a blunt tool lacking both precision and certainty as to which patients will safely achieve functional cure. The findings of our systematic review demonstrate that HBV RNA and HBcrAg are synergistic to traditional markers, including qHBsAg, in predicting off-therapy VR and CR. Early changes in these parameters with novel therapies should be explored with regard to clinical outcomes. Evidently, the most useful immune markers consist of HBV-specific T cell responses, and these should be assessed in the correct context with accessible and reproducible assays. The achievement of partial cure should be regarded as an important step towards functional cure, which remains the therapeutic goal of novel agents currently under investigation.<sup>76</sup> Both virus-targeted and immune modulatory agents (where NA discontinuation can be considered an immunomodulatory strategy) are likely to be required to achieve functional cure, and the best sequence or combination approach needs to be explored further, drawing on the data from NA discontinuation studies.

### Abbreviations

ALT, alanine aminotransferase; AUROC, area under region of curve; CHB, chronic hepatitis B; CR, clinical relapse; EOT, end of treatment; ETV, entecavir; HBcrAg, hepatitis B core-related antigen; HR, hazards ratio; IFN $\gamma$ , interferon-gamma; IP10, Interferon gamma-induced protein 10; LdT, Telbivudine; LMV, Lamivudine; MV, multivariate; NA, nucleoside analogue; NK cells, natural killer cells; OR, odds ratio; SIMs, soluble immune markers; SNP, single nucleotide polymorphism; TAF, tenofovir alafenamide; TDF, tenofovir disoproxil fumarate; TNF $\alpha$ , tumour necrosis factor-alpha; ULN, upper limit of normal; UV, univariate; VR, virological relapse; WHO, World Health Organization.

### Financial support

The authors received no financial support to produce this manuscript.

### Conflicts of interest

L-YM has served as an advisory board member for Gilead Sciences. PK has served as a speaker, a consultant/advisory board member for Abbott Diagnostics, Aligos, Antios Therapeutics, Assembly Biosciences, Gilead Sciences, Janssen, GlaxoSmithKline, Immunocore and Drug Farm, and has received research funding from Gilead Sciences. GZ, AK and UG have no conflicts of interest to disclose.

Please refer to the accompanying ICMJE disclosure forms for further details.

### Authors' contributions

Conceptualization: PTFK. Data curation: GZ, AK. Drafting of the manuscript: GZ, AK, L-YM. Reviewing and editing of the manuscript: GZ, AK, L-YM, USG, PTFK. Supervision: PTFK.

### Data availability statement

All data analysed during this study are available from the corresponding author on reasonable request.

### Supplementary data

Supplementary data to this article can be found online at <https://doi.org/10.1016/j.jhepr.2023.100720>.

### References

- [1] Trépo C, Chan HL, Lok A. Hepatitis B virus infection. *Lancet* 2014;384:2053–2063.
- [2] Jefferies M, Rauff B, Rashid H, Lam T, Rafiq S. Update on global epidemiology of viral hepatitis and preventive strategies. *World J Clin Cases* 2018;6:589–599.
- [3] World Health Organization. Hepat B 2022; <https://www.who.int/news-room/fact-sheets/detail/hepatitis-b>.
- [4] Marcellin P, Gane E, Buti M, Afdhal N, Sievert W, Jacobson IM, et al. Regression of cirrhosis during treatment with tenofovir disoproxil fumarate for chronic hepatitis B: a 5-year open-label follow-up study. *Lancet* 2013;381:468–475.
- [5] Papatheodoridis CV, Chan HL, Hansen BE, Janssen HL, Lampertico P. Risk of hepatocellular carcinoma in chronic hepatitis B: assessment and modification with current antiviral therapy. *J Hepatol* 2015;62:956–967.
- [6] Laras A, Koskinas J, Dimou E, Kostamena A, Hadziyannis SJ. Intrahepatic levels and replicative activity of covalently closed circular hepatitis B virus DNA in chronically infected patients. *Hepatology* 2006;44:694–702.
- [7] Werle-Lapostolle B, Bowden S, Locarnini S, Wurstthorn K, Petersen J, Lau G, et al. Persistence of cccDNA during the natural history of chronic hepatitis B and decline during adefovir dipivoxil therapy. *Gastroenterology* 2004;126:1750–1758.

- [8] Sarin S, Kumar M, Lau G, Abbas Z, Chan HLY, Chen CJ, et al. Asian-Pacific clinical practice guidelines on the management of hepatitis B: a 2015 update. *Hepatol Int* 2016;10:1–98.
- [9] Lampertico P, Agarwal K, Berg T, Buti M, Janssen HL, Papatheodoridis G, et al. EASL 2017 Clinical Practice Guidelines on the management of hepatitis B virus infection. *J Hepatol* 2017;67:370–398.
- [10] Terrault NA, Lok AS, McMahon BJ, Chang K, Hwang JP, Jonas MM, et al. Update on prevention, diagnosis, and treatment of chronic hepatitis B: AASLD 2018 hepatitis B guidance. *Hepatology* 2018;67:1560–1599.
- [11] Hall SAL, Vogrin S, Wawryk O, Burns GS, Visvanathan K, Sundararajan V, et al. Discontinuation of nucleos(t)ide analogue therapy in HBeAg-negative chronic hepatitis B: a meta-analysis. *Gut* 2022;71:1629–1641.
- [12] Page MJ, McKenzie JE, Bossuyt PM, Boutron I, Hoffmann TC, Mulrow CD, et al. The PRISMA 2020 statement: an updated guideline for reporting systematic reviews. *BMJ* 2021;372:n71.
- [13] Höner Zu Siederdisen C, Rinker F, Maasoumy B, Wiegand SB, Filmann N, Falk CS, et al. Viral and host responses after stopping long-term nucleos(t)ide analogue therapy in HBeAg-negative chronic hepatitis B. *J Infect Dis* 2016;214:1492–1497.
- [14] Su TH, Yang HC, Tseng TC, Liou JM, Liu CH, Chen CL, et al. Distinct relapse rates and risk predictors after discontinuing tenofovir and entecavir therapy. *J Infect Dis* 2018;217:1193–1201.
- [15] Chi H, Li Z, Hansen BE, Yu T, Zhang X, Sun J, et al. Serum level of antibodies against hepatitis B core protein is associated with clinical relapse after discontinuation of nucleos(t)ide analogue therapy. *Clin Gastroenterol Hepatol* 2019;17:182–191.e1.
- [16] Hsu YC, Nguyen MH, Mo LR, Wu MS, Yang TH, Chen CC, et al. Combining hepatitis B core-related and surface antigens at end of nucleos(t)ide analogue treatment to predict off-therapy relapse risk. *Aliment Pharmacol Ther* 2019;49:107–115.
- [17] Carey I, Gersch J, Wang B, Moigboi C, Kuhns M, Cloherty G, et al. Pregenomic HBV RNA and hepatitis B core-related antigen predict outcomes in hepatitis B e antigen-negative chronic hepatitis B patients suppressed on nucleos(t)ide analogue therapy. *Hepatology* 2020;72:42–57.
- [18] Fan R, Zhou B, Xu M, Tan D, Niu J, Wang H, et al. Association between negative results from tests for HBV DNA and RNA and durability of response after discontinuation of nucleos(t)ide analogue therapy. *Clin Gastroenterol Hepatol* 2020;18:719–727.e7.
- [19] Fan R, Peng J, Xie Q, Tan D, Xu M, Niu J, et al. Combining hepatitis B virus RNA and hepatitis B core-related antigen: guidance for safely stopping nucleos(t)ide analogues in hepatitis B e antigen-positive patients with chronic hepatitis B. *J Infect Dis* 2020;222:611–618.
- [20] García-López M, Lens S, Pallett LJ, Testoni B, Rodriguez-Tajes S, Marino Z, et al. Viral and immune factors associated with successful treatment withdrawal in HBeAg-negative chronic hepatitis B patients. *J Hepatol* 2021;74:1064–1074.
- [21] Kaewdech A, Tangkijvanich P, Sripongpan P, Witeerungrot T, Jandee S, Tanaka Y, et al. Hepatitis B surface antigen, core-related antigen and HBV RNA: predicting clinical relapse after NA therapy discontinuation. *Liver Int* 2020;40:2961–2971.
- [22] Lai CL, Wong DK, Wong GT, Seto WK, Fung J, Yuen MF. Rebound of HBV DNA after cessation of nucleos(t)ide analogues in chronic hepatitis B patients with undetectable covalently closed. *JHEP Rep* 2020;2:100112.
- [23] Liu Y, Xue J, Liao W, Yan H, Liang X. Serum HBV RNA dynamic and drug withdrawal predictor value in patients with chronic HBV infection on long-term nucleos(t)ide analogue (NA) therapy. *J Clin Gastroenterol* 2020;54:e73–e82.
- [24] Papatheodoridi M, Hadziyannis E, Berby F, Zachou K, Testoni B, Rigopoulou E, et al. Predictors of hepatitis B surface antigen loss, relapse and retreatment after discontinuation of effective oral antiviral therapy in noncirrhotic HBeAg-negative chronic hepatitis B. *J Viral Hepat* 2020;27:118–126.
- [25] Seto WK, Liu KS, Mak LY, Cloherty G, Wong DK, Gersch J, et al. Role of serum HBV RNA and hepatitis B surface antigen levels in identifying Asian patients with chronic hepatitis B suitable for entecavir cessation. *Gut* 2020;70:775–783.
- [26] Tseng TN, Hu TH, Wang JH, Kuo YH, Hung CH, Lu SN, et al. Incidence and factors associated with HBV relapse after cessation of entecavir or tenofovir in patients with HBsAg below 100 IU/mL. *Clin Gastroenterol Hepatol* 2020;18:2803–2812.
- [27] Cheng HR, Yang HC, Lin SR, Yang TY, Lin YY, Su TH, et al. Combined viral quasispecies diversity and hepatitis B core-related antigen predict off-nucleos(t)ide analog durability in HBeAg-negative patients. *Hepatol Int* 2021;15:582–592.
- [28] Huang PY, Wang JH, Hung CH, Lu SN, Hu TH, Chen CH. The role of hepatitis B virus core-related antigen in predicting hepatitis B virus relapse after cessation of entecavir in hepatitis B e antigen-negative patients. *J Viral Hepat* 2021;28:1141–1149.
- [29] Kuo YH, Wang JH, Hung CH, Lu SN, Hu TH, Chen CH. Combining end-of-treatment HBsAg and baseline hepatitis B core-related antigen reduce HBV relapse rate after tenofovir cessation. *Hepatol Int* 2021;15:301–309.
- [30] Liao G, Ding X, Xia M, Wu Y, Chen H, Fan R, et al. Hepatitis B core-related antigen is a biomarker for off-treatment relapse after long-term nucleos(t)ide analog therapy in patients with chronic hepatitis B. *Int J Gen Med* 2021;14:4967–4976.
- [31] Sonneveld MJ, Park JY, Kaewdech A, Seto WK, Tanaka Y, Carey I, et al. Prediction of sustained response after nucleos(t)ide analogue cessation using HBsAg and HBcrAg levels: a multicenter study (CREATE). *Clin Gastroenterol Hepatol* 2022;20:e784–e793.
- [32] Wübbolding M, Lopez Alfonso JC, Lin CY, Binder S, Falk C, Debarry J, et al. Pilot study using machine learning to identify immune profiles for the prediction of early virological relapse after stopping nucleos(t)ide analogues in HBeAg-negative CHB. *Hepatol Commun* 2021;5:97–111.
- [33] Xia M, Chi H, Wu Y, Hansen BE, Li Z, Liu S, et al. Serum hepatitis B virus RNA level is associated with biochemical relapse in patients with chronic hepatitis B infection who discontinue nucleos(t)ide analogue treatment. *Aliment Pharmacol Ther* 2021;54:709–714.
- [34] Xie Y, Li M, Ou X, Zheng S, Gao Y, Xu X, et al. HBeAg-positive patients with HBsAg < 100 IU/mL and negative HBV RNA have lower risk of virological relapse after nucleos(t)ide analogues cessation. *J Gastroenterol* 2021;56:856–867.
- [35] Rinker F, Zimmer CL, Höner Zu Siederdisen C, Manns MP, Kraft ARM, Wedemeyer H, et al. Hepatitis B virus-specific T cell responses after stopping nucleos(t)ide analogue therapy in HBeAg-negative chronic hepatitis B. *J Hepatol* 2018;69:584–593.
- [36] Zimmer CL, Rinker F, Höner Zu Siederdisen C, Manns MP, Wedemeyer H, Cornberg M, et al. Increased NK cell function after cessation of long-term nucleos(t)ide analogue treatment in chronic hepatitis B is associated with liver damage and HBsAg loss. *J Infect Dis* 2018;217:1656–1666.
- [37] Rivino L, Le Bert N, Gill US, Kunasegaran K, Cheng Y, Tan DZ, et al. Hepatitis B virus-specific T cells associate with viral control upon nucleos(t)ide-analogue therapy discontinuation. *J Clin Invest* 2018;128:668–681.
- [38] Kranidioti H, Manolakopoulos S, Kontos G, Breen MS, Kourikou A, Deutsch M, et al. Immunological biomarkers as indicators for outcome after discontinuation of nucleos(t)ide analogue therapy in patients with HBeAg-negative chronic hepatitis B. *J Viral Hepat* 2019;26:697–709.
- [39] Wu Y, Fan J, Liao G, Xia M, Jiang D, Peng J, et al. Genetic variations in the CXCR5 gene decrease the risk of clinical relapse after discontinuation of nucleos(t)ide analogue therapy in patients with chronic hepatitis B. *Infect Genet Evol* 2020;78:104124.
- [40] Xie L, Liao G, Chen H, Xia M, Huang X, Fong R, et al. Elevated expression of serum soluble ST2 in clinical relapse after stopping long-term nucleos(t)ide analogue therapy for chronic hepatitis B. *BMC Infect Dis* 2019;19:640.
- [41] Chen CH, Peng CY, Kuo YH, Hu TH, Hung CH, Wang JH, et al. Earlier and higher rate of hepatitis B virus relapse after discontinuing tenofovir versus entecavir in hepatitis B e Antigen-positive patients. *J Infect Dis* 2022;225:1974–1981.
- [42] Hall SA, Burns GS, Mooney BJ, Millen R, Morris R, Vogrin S, et al. Hepatitis B virus flares following nucleos(t)ide analogue cessation are associated with activation of TLR signalling pathways. *J Infect Dis* 2022;227:123–132.
- [43] Kaewdech A, Assawasuwannakit S, Sripongpan P, Chamroonkul N, Tangkijvanich P, Piratvisuth T. Clinical utility of SCALE-B to predict hepatitis B virus relapse, hepatitis B surface antigen loss after antiviral cessation in Asian patients after 2-year follow-up. *Front Med (Lausanne)* 2022;9:859430.
- [44] Papatheodoridi M, Papachristou E, Moschidis Z, Hadziyannis E, Rigopoulou E, Zachou K, et al. Significance of serum HBV RNA in non-cirrhotic HBeAg-negative chronic hepatitis B patients who discontinue effective antiviral therapy. *J Viral Hepat* 2022;29:948–957.
- [45] Sonneveld MJ, Chiu SM, Park JY, Brakenhoff SM, Kaewdech A, Seto WK, et al. Probability of HBsAg loss after nucleos(t)ide analogue withdrawal depends on HBV genotype and viral antigen levels. *J Hepatol* 2022;76:1042–1050.
- [46] Hsu Y-C, Jun DW, Peng C-Y, Yeh M-L, Trinh H, Wong GL-H, et al. Effectiveness of entecavir vs tenofovir disoproxil fumarate for functional cure of chronic hepatitis B in an international cohort. *Hepatol Int* 2022;16:1297–1307.

- [47] Hirode G, Choi HSJ, Chen CH, Su TH, Seto WK, Van Hees S, et al. Off-therapy response after nucleos(t)ide analogue withdrawal in patients with chronic hepatitis B: an international, multicenter, multiethnic cohort (RETRACT-B Study). *Gastroenterology* 2022;162:757–771.e4.
- [48] Jeng WJ, Chen YC, Chien RN, Sheen IS, Liaw YF. Incidence and predictors of hepatitis B surface antigen seroclearance after cessation of nucleos(t)ide analogue therapy in hepatitis B e antigen-negative chronic hepatitis B. *Hepatology* 2018;68:425–434.
- [49] Chen CH, Hung CH, Wang JH, Lu SN, Lai HC, Hu TH, et al. The incidence of hepatitis B surface antigen loss between hepatitis B E antigen-negative noncirrhotic patients who discontinued or continued entecavir therapy. *J Infect Dis* 2019;219:1624–1633.
- [50] Liang LB, Zhu X, Yan LB, Du LY, Liu C, Liao J, et al. Quantitative intrahepatic HBV cccDNA correlates with histological liver inflammation in chronic hepatitis B virus infection. *Int J Infect Dis* 2016;52:77–82.
- [51] Thompson AJ, Nguyen T, Iser D, Ayres A, Jackson K, Littlejohn M, et al. Serum hepatitis B surface antigen and hepatitis B e antigen titers: disease phase influences correlation with viral load and intrahepatic hepatitis B virus markers. *Hepatology* 2010;51:1933–1944.
- [52] Rydell GE, Larsson SB, Prakash K, Andersson M, Norder H, Hellstrand K, et al. Abundance of noncircular intrahepatic hepatitis B virus DNA may reflect frequent integration into human DNA in chronically infected patients. *J Infect Dis* 2022;225:1982–1990.
- [53] Svicher V, Salpini R, Piermatteo L, Carioti L, Battisti A, Colagrossi L, et al. Whole exome HBV DNA integration is independent of the intrahepatic HBV reservoir in HBeAg-negative chronic hepatitis B. *Gut* 2021;70:2337.
- [54] Wong DK, Tanaka Y, Lai CL, Mizokami M, Fung J, Yuen MF. Hepatitis B virus core-related antigens as markers for monitoring chronic hepatitis B infection. *J Clin Microbiol* 2007;45:3942–3947.
- [55] Prakash K, Rydell GE, Larsson SB, Andersson M, Norkrans G, Norder H, et al. High serum levels of pregenomic RNA reflect frequently failing reverse transcription in hepatitis B virus particles. *Virol J* 2018;15:86.
- [56] Bertoletti A, Ferrari C. Innate and adaptive immune responses in chronic hepatitis B virus infections: towards restoration of immune control of viral infection. *Gut* 2012;61:1754–1764.
- [57] Ye B, Liu X, Li X, Kong H, Tian L, Chen Y. T-cell exhaustion in chronic hepatitis B infection: current knowledge and clinical significance. *Cell Death Dis* 2015;6:e1694.
- [58] Boni C, Lampertico P, Talamona L, Giuberti T, Invernizzi F, Barili V, et al. Natural killer cell phenotype modulation and natural killer/T-cell interplay in nucleos(t)ide analogue-treated hepatitis e antigen-negative patients with chronic hepatitis B. *Hepatology* 2015;62:1697–1709.
- [59] Burton AR, Pallett LJ, McCoy LE, Suveizdyte K, Amin OE, Swadling L, et al. Circulating and intrahepatic antiviral B cells are defective in hepatitis B. *J Clin Invest* 2018;128:4588–4603.
- [60] Salimzadeh L, Le Bert N, Dutertre CA, Gill US, Newell EW, Frey C, et al. PD-1 blockade partially recovers dysfunctional virus-specific B cells in chronic hepatitis B infection. *J Clin Invest* 2018;128:4573–4587.
- [61] Milich DR, Chen M, Schödel F, Peterson DL, Jones JE, Hughes JL. Role of B cells in antigen presentation of the hepatitis B core. *Proc Natl Acad Sci U S A* 1997;94:14648–14653.
- [62] Boni C, Laccabue D, Lampertico P, Giuberti T, Vigrano M, Schivazappa S, et al. Restored function of HBV-specific T cells after long-term effective therapy with nucleos(t)ide analogues. *Gastroenterology* 2012;143:963–973.e9.
- [63] Lam YF, Seto WK, Wong D, Cheung KS, Fung J, Mak LY, et al. Seven-year treatment outcome of entecavir in a real-world cohort: effects on clinical parameters, HBsAg and HBcrAg levels. *Clin Transl Gastroenterol* 2017;8:e125.
- [64] Jaroszewicz J, Ho H, Markova A, Deterding K, Wursthorn K, Schulz S, et al. Hepatitis B surface antigen (HBsAg) decrease and serum interferon-inducible protein-10 levels as predictive markers for HBsAg loss during treatment with nucleoside/nucleotide analogues. *Antivir Ther* 2011;16:915–924.
- [65] Schurich A, Pallett LJ, Lubowiecki M, Singh HD, Gill US, Kennedy PTF, et al. The third signal cytokine IL-12 rescues the antiviral function of exhausted HBV-specific CD8 T cells. *PLoS Pathog* 2013;9:e1003208.
- [66] Chen CH, Hu TH, Wang JH, Lai HC, Hung CH, Lu SN, et al. Comparison of HBsAg changes between HBeAg-negative patients who discontinued or maintained entecavir therapy. *Hepatology* 2020;14:317–325.
- [67] Peña-Asensio J, Calvo H, Miquel J, Sanz-de-Villalobos E, Gonzalez-Praetorius A, Torralba M, et al. Model to predict on-treatment restoration of functional HBV-specific CD8(+) cell response foresees off-treatment HBV control in eAg-negative chronic hepatitis B. *Aliment Pharmacol Ther* 2022;55:1545–1559.
- [68] Liu J, Zhang E, Ma Z, Wu W, Kosinska, Zhang X, et al. Enhancing virus-specific immunity in vivo by combining therapeutic vaccination and PD-L1 blockade in chronic hepadnaviral infection. *PLoS Pathog* 2014;10:e1003856.
- [69] van Bommel F, Berg T. Risks and benefits of discontinuation of nucleos(t)ide analogue treatment: a treatment concept for patients with HBeAg-negative chronic hepatitis B. *Hepatol Commun* 2021;5:1632–1648.
- [70] Michler T, Kosinska AD, Festag J, Bunse T, Su J, Ringelhan M, et al. Knockdown of virus antigen expression increases therapeutic vaccine efficacy in high-titer hepatitis B virus carrier mice. *Gastroenterology* 2020;158:1762–1775.e9.
- [71] Agarwal K, Lok J, Carey I, Shivkar Y, Biermer M, Berg T, et al. A case of HBV-induced liver failure in the REEF-2 phase II trial: implications for finite treatment strategies in HBV 'cure. *J Hepatol* 2022;77:245–248.
- [72] Tseng CH, Chen TH, Wu JL, Lee TY, Borghi JA, Lin JT, et al. Serious adverse events after cessation of nucleos(t)ide analogues in individuals with chronic hepatitis B: a systematic review and meta-analysis. *JHEP Rep* 2023;5:100617.
- [73] Mak LY, Wong D, Kuchta A, Hilfiker M, Hamilton A, Chow N, et al. Hepatitis B virus pre-genomic RNA and hepatitis B core-related antigen reductions at week 4 predict favourable hepatitis B surface antigen response upon long-term nucleos(t)ide analogue in chronic hepatitis B. *Clin Mol Hepatol* 2023;29:146–162.
- [74] Gehring AJ, Mendez P, Richter K, Ertl H, Donaldson EF, Mishra P, et al. Immunological biomarker discovery in cure regimens for chronic hepatitis B virus infection. *J Hepatol* 2022;77:525–538.
- [75] Gill US, Pallett LJ, Thomas N, Burton AR, Patel AA, Yona S, et al. Fine needle aspirates comprehensively sample intrahepatic immunity. *Gut* 2019;68:1493–1503.
- [76] Cornberg M, Lok AS-F, Terrault NA, Zoulim F, Berg T, Brunetto MR, et al. Guidance for design and endpoints of clinical trials in chronic hepatitis B – Report from the 2019 EASL-AASLD HBV Treatment Endpoints Conference. *J Hepatol* 2020;72:539–557.

**Journal of Hepatology, Volume 5**

**Supplemental information**

**Utility of novel viral and immune markers in predicting HBV treatment endpoints: A systematic review of treatment discontinuation studies**

**Georgia Zeng, Apostolos Koffas, Lung-Yi Mak, Upkar S. Gill, and Patrick T.F. Kennedy**

**Utility of novel viral and immune markers in predicting HBV  
treatment endpoints: A systematic review of treatment  
discontinuation studies**

Georgia Zeng, Apostolos Koffas, Lung-Yi Mak, Upkar S. Gill, Patrick TF Kennedy

Table of contents

|               |   |
|---------------|---|
| Table S1..... | 2 |
| Table S2..... | 3 |
| Table S3..... | 4 |



**Table S1: International Guidelines on HBV Treatment Cessation**

| <b>International Guidelines on HBV Treatment Cessation (<i>In absence of HBsAg loss</i>)</b> |                                                                                                                                    |
|----------------------------------------------------------------------------------------------|------------------------------------------------------------------------------------------------------------------------------------|
| <b>APASL (2015)</b>                                                                          |                                                                                                                                    |
| <b>HBeAg+ populations</b>                                                                    | HBeAg seroconversion & at least 1-3 years of consolidation therapy following virological suppression                               |
| <b>HBeAg- populations</b>                                                                    | At least 2 years of treatment & 1 year of consolidation therapy following virological suppression (tested 3 times, 6 months apart) |
| <b>Follow-up</b>                                                                             | Follow-up monthly for first 3 months, then every 3-6 months indefinitely                                                           |
| <b>EASL (2017)</b>                                                                           |                                                                                                                                    |
| <b>HBeAg+ populations</b>                                                                    | HBeAg seroconversion & at least 6-12 months of consolidation therapy following virological suppression                             |
| <b>HBeAg- populations</b>                                                                    | At least 3 years of consolidation therapy following virological suppression                                                        |
| <b>Follow-up</b>                                                                             | Close post-NA therapy monitoring required                                                                                          |
| <b>AASLD (2018)</b>                                                                          |                                                                                                                                    |
| <b>HBeAg+ populations</b>                                                                    | HBeAg seroconversion & at least 12 months of consolidation therapy following virological suppression                               |
| <b>HBeAg- populations</b>                                                                    | Indefinite treatment unless compelling rationale                                                                                   |
| <b>Follow-up</b>                                                                             | Follow-up every 3 months for at least 1 year                                                                                       |

Abbreviations: AASLD: American Association for the Study of Liver Diseases, APASL: Asian Pacific Association for the Study of the Liver, EASL: European Association for the Study of the Liver; HBeAg+: initial e-Antigen positive population; HBeAg-: initial e-Antigen negative population; HBsAg: hepatitis B surface antigen

**Table S2: Risk of Bias Assessment in Studies Exploring Viral Markers**

| <b>Paper</b>                                | <b>D1</b> | <b>D2</b> | <b>D3</b> | <b>D4</b> | <b>D5</b> | <b>D6</b> | <b>D7</b> | <b>Overall</b> |
|---------------------------------------------|-----------|-----------|-----------|-----------|-----------|-----------|-----------|----------------|
| <b>Honer Zu Siederdisen, C., et al 2016</b> | Moderate  | Low       | Low       | Low       | Low       | Low       | Serious   | Moderate       |
| <b>Hsu, Y.C., et al 2019</b>                | Moderate  | Low       | Low       | Low       | Moderate  | Low       | Moderate  | Moderate       |
| <b>Carey, I., et al 2020</b>                | Low       | Moderate  | Low       | Low       | Moderate  | Low       | Moderate  | Moderate       |
| <b>Fan, R., et al 2020</b>                  | Moderate  | Low       | Low       | Low       | Low       | Low       | Moderate  | Low            |
| <b>Fan, R., et al 2020B</b>                 | Moderate  | Low       | Low       | Low       | Low       | Low       | Moderate  | Low            |
| <b>Garcia-Lopez, M., et al 2020</b>         | Moderate  | Low       | Low       | Low       | Low       | Low       | Moderate  | Low            |
| <b>Kaewdech, A., et al 2020</b>             | Moderate  | Low       | Low       | Low       | Low       | Low       | Serious   | Moderate       |
| <b>Lai, C.L., et al 2020</b>                | Moderate  | Low       | Low       | Low       | Low       | Low       | Moderate  | Low            |
| <b>Liu, Y., et al 2020</b>                  | Moderate  | Moderate  | Low       | Low       | Moderate  | Low       | Moderate  | Moderate       |
| <b>Papatheodoridi, M., et al 2020</b>       | Moderate  | Low       | Low       | Low       | Moderate  | Low       | Moderate  | Moderate       |
| <b>Seto, W.K., et al 2020</b>               | Moderate  | Low       | Low       | Low       | Low       | Low       | Moderate  | Low            |
| <b>Tseng, T.N., et al 2020*</b>             | Moderate  | Low       | Low       | Low       | Moderate  | Low       | Moderate  | Moderate       |
| <b>Cheng, H.R., et al 2021</b>              | Moderate  | Low       | Low       | Low       | Low       | Low       | Moderate  | Low            |
| <b>Huang, P.Y., et al 2021</b>              | Moderate  | Low            |
| <b>Kuo, Y.H., et al 2021</b>                | Moderate  | Low            |
| <b>Liao, G., et al 2021</b>                 | Moderate  | Low       | Low       | Low       | Low       | Low       | Moderate  | Low            |
| <b>Sonneveld, M.J., et al 2022A</b>         | Moderate  | Low            |
| <b>Wubbolding, L.A., et al 2021</b>         | Moderate  | Low       | Low       | Low       | Low       | Low       | Serious   | Moderate       |
| <b>Xia, M., et al 2021</b>                  | Moderate  | Low            |
| <b>Xie, Y., et al 2021</b>                  | Moderate  | Low            |
| <b>Chen, C.H., et al 2022</b>               | Moderate  | Low       | Low       | Low       | Low       | Low       | Moderate  | Low            |
| <b>Kaewdech, A., et al 2022</b>             | Moderate  | Low       | Low       | Low       | Low       | Low       | Moderate  | Low            |
| <b>Papatheodoridi, M., et al 2022</b>       | Moderate  | Low       | Low       | Low       | Low       | Low       | Moderate  | Low            |
| <b>Sonneveld, M.J., et al 2022B</b>         | Moderate  | Low            |

Bias Domains included in the Robins-I tool

- D1: Bias due to confounding
- D2: Bias in selection of participants into the study
- D3: Bias in classification of interventions
- D4: Bias due to deviations from intended interventions
- D5: Bias due to missing data
- D6: Bias in measurement of the outcome
- D7: Bias in selection of the reported result

**Table S3: Comparison of HBV RNA Platforms**

| Paper                         | HBV RNA Platform                                                                                     | Lower Limit of Detection                 |
|-------------------------------|------------------------------------------------------------------------------------------------------|------------------------------------------|
| Carey, I., et al 2020         | m2000 system (Abbott Molecular)                                                                      | 1.65 log U/mL                            |
| Fan, R., et al 2020           | LightCycler 480 Instrument II system (Roche, Mannheim, Germany) with Taqman probe method             | 3 log U/mL                               |
| Fan, R., et al 2020           | LightCycler 480 Instrument II system (Roche, Mannheim, Germany) with Taqman probe method             | 3 log U/mL                               |
| Garcia-Lopez, et al 202       | TaqMan Fast Virus 1-Step Master Mix (Applied Biosystems, Thermo Fisher Scientific, Waltham, MA, USA) | 6 copies per reaction                    |
| Kaewdech, A., et al 202       | Droplet digital PCR (Bio-Rad, Hercules, CA, USA)                                                     | 2 log copies/mL                          |
| Lai, C.L., et al 202          | LightCycler 1.5 (Roche Applied Science, Mannheim, Germany)                                           | 800 copies/mL                            |
| Liu, Y., et al 202            | AutoSAT system (Rendu Biotechnology)                                                                 | 100 copies/mL                            |
| Seto, W.K., et al 202         | m2000 system (Abbott Molecular)                                                                      | 1.65 log U/mL                            |
| Xia, M., et al, 2021          | LightCycler 480 Instrument II system (Roche, Mannheim, Germany) with Taqman probe method             | 3 log U/mL                               |
| Xie, Y., et al 202            | ABI Prism 7500 Real-time PCR System (ABI, USA)                                                       | Not specified                            |
| Kaewdech, A., et al 202       | Droplet digital PCR (Bio-Rad, Hercules, CA, USA)                                                     | 2 log copies/mL                          |
| Papatheodoridi, M., et al 202 | LightCycler 1.5 (Roche Applied Science, Mannheim, Germany)                                           | 10 copies per reaction or 1320 copies/mL |
